# Supplementary material for: Evaluation of an Aspergillus IgG/IgM lateral flow assay for serodiagnosis of fungal asthma in Uganda
Source: PubMed Central journal article supplement (PMC8162618; doi:10.1371/journal.pone.0252553), 2021-05-28
Supplement: pone.0252553.s001.pdf [file pone.0252553.s001.pdf]

**S1 Table. Extended baseline characteristics of the study population**

| Characteristic                       | Overall<br>(N=374) |                          | Intermittent & mild<br>asthma<br>(N=88) |                          | moderate persistent &<br>severe persistent<br>asthma<br>(N=286) |                          | P-value |
|--------------------------------------|--------------------|--------------------------|-----------------------------------------|--------------------------|-----------------------------------------------------------------|--------------------------|---------|
|                                      | N                  | n (%) or median<br>(IQR) | N                                       | n (%) or median<br>(IQR) | N                                                               | n (%) or median<br>(IQR) |         |
| Current age in years, median         | 369                | 34 (25 - 45)             | 88                                      | 29 (23 - 41)             | 281                                                             | 35 (26 - 46)             | 0.013   |
| Age when first diagnosed with asthma | 372                | 25 (15 - 36)             | 87                                      | 23 (15 - 33)             | 285                                                             | 25 (15 - 36)             | 0.650   |
| Categories of current age in years   | 367                |                          | 87                                      |                          | 280                                                             |                          |         |
| 18 - 24                              |                    | 86 (23.4)                |                                         | 24 (27.6)                |                                                                 | 62 (22.1)                | 0.234   |
| 25 - 34                              |                    | 102 (27.8)               |                                         | 31 (35.6)                |                                                                 | 71 (25.4)                |         |
| 35 - 44                              |                    | 82 (22.3)                |                                         | 15 (17.2)                |                                                                 | 67 (23.9)                |         |
| 45 - 54                              |                    | 49 (13.4)                |                                         | 8 (9.2)                  |                                                                 | 41 (14.6)                |         |
| 55 - 64                              |                    | 37 (10.1)                |                                         | 7 (8)                    |                                                                 | 30 (10.7)                |         |
| 65+                                  |                    | 11 (3)                   |                                         | 2 (2.3)                  |                                                                 | 9 (3.2)                  |         |
| Male Gender                          | 374                | 88 (23.5)                | 88                                      | 20 (22.7)                | 286                                                             | 68 (23.8)                | 0.839   |
| Overall BMI                          | 374                | 24.8 (21.6 - 29.5)       | 88                                      | 23.7 (20.9 - 28.9)       | 286                                                             | 25.7 (21.6 - 29.7)       | 0.104   |
| Underweight                          |                    | 22 (5.9)                 |                                         | 5 (5.7)                  |                                                                 | 17 (5.9)                 |         |
| Normal                               |                    | 168 (44.9)               |                                         | 50 (56.8)                |                                                                 | 118 (41.3)               | 0.040   |
| Overweight                           |                    | 103 (27.5)               |                                         | 15 (17)                  |                                                                 | 88 (30.8)                |         |
| Obese                                |                    | 81 (21.7)                |                                         | 18 (20.5)                |                                                                 | 63 (22)                  |         |
| Marital Status                       | 374                |                          | 88                                      |                          | 286                                                             |                          |         |
| Single                               |                    | 131 (35)                 |                                         | 35 (39.8)                |                                                                 | 96 (33.6)                | 0.031   |
| Married                              |                    | 188 (50.3)               |                                         | 44 (50)                  |                                                                 | 144 (50.3)               |         |
| Separated                            |                    | 27 (7.2)                 |                                         | 8 (9.1)                  |                                                                 | 19 (6.6)                 |         |
| Widowed                              |                    | 28 (7.5)                 |                                         | 1 (1.1)                  |                                                                 | 27 (9.4)                 |         |
| Highest level of education           | 374                |                          | 88                                      |                          | 286                                                             |                          |         |
| None                                 |                    | 14 (3.7)                 |                                         | 2 (2.3)                  |                                                                 | 12 (4.2)                 | 0.001   |
| Primary                              |                    | 118 (31.6)               |                                         | 16 (18.2)                |                                                                 | 102 (35.7)               |         |
| Secondary                            |                    | 133 (35.6)               |                                         | 46 (52.3)                |                                                                 | 87 (30.4)                |         |
| Tertiary                             |                    | 109 (29.1)               |                                         | 24 (27.3)                |                                                                 | 85 (29.7)                |         |
| Occupational risk                    | 373                |                          | 88                                      |                          | 285                                                             |                          |         |

|                                               |     |                |    |               |     |                |       |
|-----------------------------------------------|-----|----------------|----|---------------|-----|----------------|-------|
| <b>Low</b>                                    |     | 200 (53.6)     |    | 45 (51.1)     |     | 155 (54.4)     | 0.347 |
| <b>Moderate</b>                               |     | 123 (33.0)     |    | 34 (38.6)     |     | 89 (31.2)      |       |
| <b>High</b>                                   |     | 50 (13.4)      |    | 9 (10.2)      |     | 41 (14.4)      |       |
| <b>Cough</b>                                  | 374 | 170 (45.5)     | 88 | 31 (35.2)     | 286 | 139 (48.6)     | 0.028 |
| <b>Duration in days</b>                       | 170 | 7 (5 - 30)     | 31 | 7 (7 - 30)    | 139 | 7 (5 - 30)     | 0.716 |
| <b>Wheezing</b>                               | 374 | 152 (40.6)     | 88 | 24 (27.3)     | 286 | 128 (44.8)     | 0.004 |
| <b>Duration in days</b>                       | 152 | 7 (5 - 25.5)   | 24 | 10.5 (7 - 22) | 128 | 7 (4 - 25.5)   | 0.267 |
| <b>Chest Pain</b>                             | 374 | 119 (31.8)     | 88 | 18 (20.5)     | 286 | 101 (35.3)     | 0.009 |
| <b>Duration in days</b>                       | 118 | 7 (7 - 14)     | 18 | 10.5 (7 - 16) | 100 | 7 (3 - 14)     | 0.157 |
| <b>Shortness of breath</b>                    | 374 | 105 (28.1)     | 88 | 14 (15.9)     | 286 | 91 (31.8)      | 0.004 |
| <b>Duration in days</b>                       | 105 | 7 (3 - 14)     | 14 | 14 (7 - 30)   | 91  | 7 (3 - 14)     | 0.081 |
| <b>Blocked Nose</b>                           | 374 | 32 (8.6)       | 88 | 6 (6.8)       | 286 | 26 (9.1)       | 0.505 |
| <b>Duration in days</b>                       | 32  | 8.5 (5 - 30)   | 6  | 10.5 (5 - 30) | 26  | 8.5 (5 - 30)   | 0.942 |
| <b>Running nose</b>                           | 374 | 22 (5.9)       | 88 | 8 (9.1)       | 286 | 14 (4.9)       | 0.144 |
| <b>Duration in days</b>                       | 22  | 12 (7 - 30)    | 8  | 7 (7 - 30)    | 14  | 14 (7 - 30)    | 0.422 |
| <b>Sputum production</b>                      | 374 | 22 (5.9)       | 88 | 3 (3.4)       | 286 | 19 (6.6)       | 0.312 |
| <b>Duration in days</b>                       | 21  | 7 (41760)      | 3  | 7 (11140)     | 18  | 7 (41760)      | 0.627 |
| <b>Sore throat</b>                            | 374 | 4 (1.1)        | 88 | 0 (0)         | 286 | 4 (1.4)        | 0.577 |
| <b>Duration in days</b>                       | 4   | 5 (2.5 - 18.5) | 0  |               | 4   | 5 (2.5 - 18.5) | NA    |
| <b>Level of asthma control</b>                | 372 |                |    |               |     |                |       |
| <b>Well controlled</b>                        |     | 94 (25.3)      | 88 | 46 (52.3)     | 284 | 48 (16.8)      | 0.000 |
| <b>Not well controlled</b>                    |     | 278 (74.7)     |    | 42 (47.7)     |     | 236 (82.5)     |       |
| <b>Currently comorbidities</b>                | 374 |                | 88 |               | 286 |                |       |
| <b>Rhino sinusitis</b>                        |     | 115 (30.7)     |    | 33 (37.5)     |     | 82 (28.7)      | 0.117 |
| <b>Gastroesophageal reflux disease</b>        |     | 90 (24.1)      |    | 15 (17)       |     | 75 (26.2)      | 0.078 |
| <b>Hypertension</b>                           |     | 42 (11.2)      |    | 7 (8)         |     | 35 (12.2)      | 0.266 |
| <b>HIV</b>                                    |     | 28 (7.5)       |    | 3 (3.4)       |     | 25 (8.7)       | 0.109 |
| <b>Eczema/dermatitis</b>                      |     | 23 (6.1)       |    | 3 (3.4)       |     | 20 (7)         | 0.311 |
| <b>Obstructive sleep apnea</b>                |     | 10 (2.7)       |    | 1 (1.1)       |     | 9 (3.1)        | 0.463 |
| <b>Depression or other psychiatry illness</b> |     | 3 (0.8)        |    | 0 (0)         |     | 3 (1)          | 1.000 |
| <b>Heart failure</b>                          |     | 1 (0.3)        |    | 0 (0)         |     | 1 (0.3)        | 1.000 |
| <b>Nasal polyps</b>                           |     | 0 (0)          |    | 0 (0)         |     | 0 (0)          | NA    |
| <b>COPD</b>                                   |     | 0 (0)          |    | 0 (0)         |     | 0 (0)          | NA    |
| <b>None of the above</b>                      |     | 171 (45.7)     |    | 42 (47.7)     |     | 147 (51.4)     | 0.385 |

|                                                   |     |                    |    |                    |     |                    |       |
|---------------------------------------------------|-----|--------------------|----|--------------------|-----|--------------------|-------|
| <b>Pre-measurements</b>                           |     |                    | 88 |                    | 286 |                    |       |
| <b>FVC</b>                                        | 374 | 2.9 (2.2 - 3.4)    |    | 3.3 (2.9 - 3.6)    |     | 2.7 (2.1 - 3.2)    | 0.000 |
| <b>FVC%</b>                                       | 374 | 100 (83 - 112)     |    | 110 (103 - 120)    |     | 95.5 (78 - 109)    | 0.000 |
| <b>FEV1</b>                                       | 374 | 2.1 (1.6 - 2.7)    |    | 2.6 (2.3 - 3.0)    |     | 1.97 (1.4 - 2.5)   | 0.000 |
| <b>FEV1%</b>                                      | 374 | 88 (65 - 105)      |    | 103 (91.5 - 115.5) |     | 79 (60 - 100)      | 0.000 |
| <b>FEV1/FVC ratio</b>                             | 374 | 0.76 (0.66 - 0.84) |    | 0.82 (0.74 - 0.88) |     | 0.73 (0.63 - 0.83) | 0.000 |
| <b>Lung function</b>                              | 374 |                    |    |                    |     |                    |       |
| <b>Normal</b>                                     |     | 201 (53.7)         |    | 76 (86.4)          |     | 125 (43.7)         | 0.000 |
| <b>Poor</b>                                       |     | 173 (46.3)         |    | 12 (13.6)          |     | 161 (56.3)         |       |
| <b>Post-measurement</b>                           |     |                    | 9  |                    | 117 |                    |       |
| <b>FVC</b>                                        | 126 | 2.6 (2.2 - 3.4)    |    | 3.1 (2.8 - 3.6)    |     | 2.62 (2.2 - 3.4)   | 0.050 |
| <b>FVC %</b>                                      | 126 | 99.5 (80 - 112)    |    | 117 (111 - 120)    |     | 97 (80 - 111)      | 0.002 |
| <b>FEV1</b>                                       | 126 | 1.8 (1.3 - 2.3)    |    | 2.3 (2.1 - 2.5)    |     | 1.73 (1.29 - 2.2)  | 0.010 |
| <b>FEV1%</b>                                      | 126 | 73.5 (56 - 89)     |    | 98 (92 - 103)      |     | 71 (56 - 87)       | 0.000 |
| <b>FEV1/FVC ratio</b>                             | 126 | 0.65 (0.56 - 0.71) |    | 0.74 (0.7 - 0.76)  |     | 0.64 (0.56 - 0.71) | 0.006 |
| <b>Methacholine challenge test</b>                | 361 |                    | 85 |                    | 277 |                    |       |
| <b>Positive</b>                                   |     | 23 (6.4)           |    | 2 (2.4)            |     | 21 (7.6)           | 0.190 |
| <b>Negative</b>                                   |     | 338 (93.4)         |    | 83 (97.6)          |     | 255 (92.1)         |       |
| <b>Skin prick, at least one allergen positive</b> | 331 |                    | 71 |                    | 260 | (0)                |       |
| <b>Yes</b>                                        |     | 310 (93.7)         |    | 67 (94.4)          |     | 243 (93.5)         | 1.000 |
| <b>No</b>                                         |     | 21 (6.3)           |    | 4 (5.6)            |     | 17 (6.5)           |       |
| <b>Eosinophilic count</b>                         | 374 |                    |    |                    |     |                    |       |
| <b>AEC&lt;500</b>                                 |     | 310 (82.9)         |    | 72 (81.8)          |     | 238 (83.2)         | 0.761 |
| <b>AEC&gt;=500</b>                                |     | 64 (17.1)          |    | 16 (18.2)          |     | 48 (16.8)          |       |
| <b>Eosinophil count</b>                           | 374 | 210 (110 - 390)    |    | 200 (110 - 410)    |     | 215 (100 - 390)    | 0.984 |
| <b>Total BHQ score</b>                            | 374 | 72 (49 - 98)       | 88 | 61.5 (32.5 - 78.5) | 286 | 77.5 (53 - 102)    | 0.000 |
| <b>Patient uses ICS</b>                           | 370 | 34 (9.2)           | 87 | 3 (3.4)            | 283 | 31 (11)            | 0.034 |
| <b>History of smoking</b>                         | 374 |                    | 88 |                    | 286 |                    |       |
| <b>Current smoker</b>                             |     | 1 (0.3)            |    | 0 (0)              |     | 1 (0.3)            | 0.569 |
| <b>Former smoker</b>                              |     | 22 (5.9)           |    | 7 (8)              |     | 15 (5.2)           |       |
| <b>Never</b>                                      |     | 351 (93.9)         |    | 81 (92)            |     | 270 (94.4)         |       |
| <b>Secondary smoker</b>                           | 374 | 20 (5.3)           | 88 | 4 (4.5)            | 286 | 16 (5.6)           | 1.000 |
| <b>Relatives who have asthma</b>                  | 372 |                    | 87 |                    | 285 |                    |       |
| <b>Yes</b>                                        |     | 222 (59.7)         |    | 50 (57.5)          |     | 172 (60.4)         | 0.149 |

|                                                                                    |     |            |    |           |     |            |       |
|------------------------------------------------------------------------------------|-----|------------|----|-----------|-----|------------|-------|
| <b>No</b>                                                                          |     | 89 (23.9)  |    | 27 (31)   |     | 62 (21.8)  |       |
| <b>Don't know</b>                                                                  |     | 61 (16.4)  |    | 10 (11.5) |     | 51 (17.9)  |       |
| <b>Exposed to firewood/ charcoal smoke</b>                                         | 374 | 344 (92)   | 88 | 76 (86.4) | 286 | 268 (93.7) | 0.027 |
| <b>Use of kerosene for lighting or cooking</b>                                     | 374 | 374 (100)  | 88 | 12 (13.6) | 286 | 37 (12.9)  | 0.865 |
| <b>Depression status according to total PHQ-9 score</b>                            | 374 |            | 88 |           | 286 |            |       |
| <b>No depression</b>                                                               |     | 15 (4)     |    | 9 (10.2)  |     | 6 (2.1)    | 0.000 |
| <b>Minimal depression</b>                                                          |     | 96 (25.7)  |    | 27 (30.7) |     | 69 (24.1)  |       |
| <b>Mild depression</b>                                                             |     | 113 (30.2) |    | 32 (36.4) |     | 81 (28.3)  |       |
| <b>Moderate depression</b>                                                         |     | 92 (24.6)  |    | 11 (12.5) |     | 81 (28.3)  |       |
| <b>Moderately severe depression</b>                                                |     | 47 (12.6)  |    | 9 (10.2)  |     | 38 (13.3)  |       |
| <b>Severe depression</b>                                                           |     | 11 (2.9)   |    | 0 (0)     |     | 11 (3.8)   |       |
| <b>Patient uses inhaler medication</b>                                             | 370 | 108 (29.2) | 87 | 13 (14.9) | 283 | 95 (33.6)  | 0.001 |
| <b>Asthma triggers</b>                                                             | 374 |            | 88 |           | 286 |            |       |
| <b>Upper respiratory infection</b>                                                 |     | 371 (99.2) |    | 87 (98.9) |     | 284 (99.3) | 0.514 |
| <b>Exposure to household pets such as cats, dogs or poultry</b>                    |     | 13 (3.5)   |    | 4 (4.5)   |     | 9 (3.1)    | 0.514 |
| <b>Smoking or exposure to tobacco smoke</b>                                        |     | 356 (95.2) |    | 81 (92)   |     | 275 (96.2) | 0.115 |
| <b>Strong emotions such as anger, excitement, anxiety</b>                          |     | 223 (59.6) |    | 45 (51.1) |     | 178 (62.2) | 0.063 |
| <b>Cold weather</b>                                                                |     | 341 (91.2) |    | 82 (93.2) |     | 259 (90.6) | 0.448 |
| <b>Drugs such those treating high blood pressure and pain killers like aspirin</b> |     | 1 (0.3)    |    |           |     | 1 (0.3)    | 1.000 |
| <b>Exercise</b>                                                                    |     | 116 (31)   |    | 21 (23.9) |     | 95 (33.2)  | 0.097 |
| <b>Dust</b>                                                                        |     | 359 (96)   |    | 83 (94.3) |     | 276 (96.5) | 0.361 |
| <b>Strong smells or perfumes</b>                                                   |     | 315 (84.2) |    | 74 (84.1) |     | 241 (84.3) | 0.969 |
| <b>Exposure at work</b>                                                            |     | 13 (3.5)   |    | 2 (2.3)   |     | 11 (3.8)   | 0.741 |
| <b>Other</b>                                                                       |     | 5 (1.3)    |    | 2 (2.3)   |     | 3 (1)      | 0.336 |
| <b>None of the above</b>                                                           |     | 0 (0)      |    | 0 (0)     |     | 0 (0)      | NA    |
