# Supplementary material for: Evaluation of an Aspergillus IgG/IgM lateral flow assay for serodiagnosis of fungal asthma in Uganda
Source: PLoS One. 2021 May 28;16(5):e0252553. doi: 10.1371/journal.pone.0252553 (PMC8162618; doi:10.1371/journal.pone.0252553)
Supplement: S1 Dataset — (XLSX) [file pone.0252553.s002.xlsx]

## Sheet: PATIENTS
No	PTID	age	sex	identification_complete	marital_status	current_occup	curr_occup_other	average_income	Occupational risk	previous_occup	prev_occup_other	education	age_asthma	relative_asthma	family_social_and_demographic_co	hist_smoke	dura_smoke	cigar_number	years_stop	contact_smoke	dura_contact	biomass_smoke	kerosene	years_kerosene	contact___1	contact___2	contact___3	contact___4	contact___5	contact___6	contact___7	contact___8	contact___9	contact___10	contact___11	chemical_spec	contact_other	current_school	school_missed	exposures_complete	current_disease___1	current_disease___2	current_disease___3	current_disease___4	current_disease___5	current_disease___6	current_disease___7	current_disease___8	current_disease___9
1	256348	28	1	2	1	16	ELECTRICIAN		1	16	ELECTRICIAN	4	19	2	2	3				0		1	1	3	0	1	1	1	0	0	0	0	1	0	0			0		2	0	0	0	0	0	0	0	0	0
2	256349	41	2	2	2	13		740000	2	13		4	26	1	2	3				0		1	0		0	1	1	0	0	1	0	1	1	0	0			0		2	0	0	0	0	1	0	0	0	0
3	256350	39	2	2	2	4		100000	2	4		3	27	2	2	3				0		1	0		0	0	1	0	0	1	1	0	1	0	0	CHICKEN WASTE		0		2	0	0	0	0	0	0	0	0	0
4	256353	58	2	2	4	1			1	1		2	58	3	2	3				0		1	1	20	0	1	1	1	1	0	0	0	1	0	0			0		2	1	0	0	1	1	0	0	0	0
5	256354	25	2	2	1	14		500000	1	11		4	19	1	2	3				0		0	0		0	0	0	0	0	0	1	0	1	0	0	PERFUME		1	0	2	0	0	0	0	0	0	0	0	0
6	256355	48	1	2	3	16	PASTOR	400000	1	16	PASTOR	2	48	1	2	2	1	31	44	0		0	0		0	0	0	1	0	1	0	0	1	0	0			0		2	1	0	0	0	0	0	0	0	0
7	256356	59	1	2	2	1			1	4		1	56	1	2	3				0		1	0		1	0	0	1	0	0	0	1	1	0	0			0		2	1	0	0	0	0	0	0	0	0
8	256357	65	1	2	2	1			1	5		2	63	2	2	2	35	20	16	1	365	1	0		1	0	1	1	0	0	0	0	1	0	0			0		2	0	0	0	0	0	0	0	0	0
9	256358	24	2	2	1	1			1	16	SALES MANAGER	3	16	1	2	3				0		1	1	6	0	0	0	1	0	0	0	1	1	0	0			0		2	1	0	0	0	1	0	0	0	0
10	256359	21	1	2	1	11			1	11		3	1	1	2	3				0		1	0		0	0	0	0	0	0	0	1	1	0	0			1	3	2	1	0	0	0	1	0	0	0	0
11	256361	60	2	2	1	1			1	16	FISHERMONGER	2	60	3	2	3				0		1	0		0	0	0	1	0	0	0	0	1	0	0			0		2	0	0	0	0	0	0	0	0	0
12	256362	59	1	2	2	1			1	4		3	23	2	2	2	12	3	33	0		1	1	35	0	0	1	1	0	0	0	1	1	0	0			0		2	1	0	0	0	1	0	0	0	0
13	256365	20	2	2	1	11			1	11		3	10	1	2	3				0		1	0		0	0	1	1	0	1	1	0	1	0	0	RUBBISH PIT		1	14	2	0	0	0	0	0	1	0	0	0
14	256366	19	2	2	1	11			1	11		3	19	3	2	3				0		1	0		1	0	0	0	0	0	0	0	1	0	0			1	0	2	0	0	0	0	0	0	0	0	0
15	256367	29	2	2	2	4			2	4		2	29	2	2	3				0		1	0		0	0	1	1	0	0	0	0	1	0	0			0		2	0	0	0	0	0	0	0	0	0
16	256368	20	2	2	1	11			1	11		4	20	1	2	3				0		1	0		0	0	0	1	0	0	0	0	1	0	0			1	4	2	0	0	0	0	0	0	0	0	0
17	256369	18	2	2	1	11			1	11		3	13	3	2	3				1	204	1	1	204	1	1	1	1	0	1	0	0	1	0	0			1	40	2	0	0	0	0	0	0	0	0	0
18	256370	31	2	2	2	2			1	2		3	28	1	2	3				0		1	0		1	1	1	1	0	1	0	0	1	0	0			0		2	0	0	0	0	0	0	0	0	0
19	256371	35	1	2	2	5			3	5		3	32	2	0	3				0		1	1	5	0	0	0	1	0	0	0	1	1	0	0			0		2	1	0	0	0	1	0	0	0	0
20	256372	26	1	2	2	16	SUPERVISOR QUARRY		3	16	DRIVER	3	13	2	2	3				0		1	0		0	0	0	1	0	0	0	1	1	0	0			0		2	1	0	1	0	1	0	0	0	0
21	256373	48	2	2	2	3			3	3		2	46	1	0	3				0		1	1	8	0	0	1	1	0	1	0	0	1	0	0			0		2	0	0	0	0	1	0	0	0	0
22	256374	34	2	2	2	2			1	2		4	30	2	0	3				0		1	0		1	0	0	1	0	0	0	1	1	0	0			0		2	1	0	0	0	0	0	0	0	0
23	256375	68	2	2	2	2			1	2		3	60	1	0	3				0		1	0		0	0	1	1	0	0	0	1	1	0	0			0		2	0	0	0	0	1	0	0	0	0
24	256376	42	2	2	2	1			1	1		3	22	1	2	3				0		1	0		0	0	0	1	1	0	0	0	1	0	0			0		2	0	0	0	0	0	0	0	0	0
25	256377	63	2	2	4	1			1	1		2	40	1	2	3				0		1	0		0	0	1	1	1	0	0	0	1	0	0			0		2	0	0	0	0	0	0	0	0	0
26	256378	54	1	2	2	16	DRIVER	300000	3	16	DRIVER	3	51	3	2	2	10	10	29	0		0	0		0	0	0	1	0	1	0	1	1	0	0			0		2	0	0	0	0	0	0	1	0	0
27	256380	36	2	2	2	2			1	2		2	19	3	2	3				0		1	0		0	1	0	1	0	1	0	0	1	0	0			0		2	0	0	0	0	1	0	0	0	0
28	256381	29	2	2	2	7		200000	1	7		4	29	2	2	3				0		1	0		0	1	1	0	0	1	0	0	1	0	0			0		2	0	0	0	0	0	0	0	0	0
29	256382	35	1	2	2	3			3	3		2	10	1	0	3				0		1	0		0	0	0	1	0	1	0	1	1	0	0			0		2	0	0	0	0	0	0	0	0	0
30	256383	38	2	2	2	16	SHOP ATTENDANT		2	2		3	37	1	0	3				0		1	1	10	0	0	1	1	0	0	0	1	1	0	0			0		2	1	0	0	0	0	0	0	0	0
31	256384	34	2	2	3	16	SALES SPARES		2	2		3	30	2	0	3				0		1	0		0	0	0	1	0	0	0	1	1	0	0			0		2	0	0	0	0	0	0	0	0	0
32	256385	45	2	2	3	16	HAIR DRESSOR		2	2		2	44	1	0	3				1	240	1	1	10	1	1	1	0	0	0	0	1	1	0	0			0		2	1	0	0	0	0	0	1	0	0
33	256386	29	2	2	2	1			1	1		4	3	1	2	3				0		1	0		0	0	0	1	0	0	1	0	1	0	0	PERFUME		0		2	0	0	0	0	0	0	0	0	0
34	256387	38	2	2	3	16	VENDOR		3	16	VENDOR	2	38	1	0	3				0		1	0		0	0	0	0	0	0	0	1	1	0	0			0		2	1	0	0	0	0	0	0	0	0
35	256388	19	1	2	1	11			1	11		3	1	2	2	3				0		1	0		0	0	0	0	0	0	0	0	1	0	0			1	0	2	1	0	0	0	1	0	0	0	0
36	256390	29	2	2	2	1			1	1		3	28	1	2	3				0		1	0		1	1	0	1	0	1	0	0	1	0	0			0		2	1	0	0	0	0	0	0	0	0
37	256391	43	2	2	2	1			1	1		4	43	2	2	3				0		1	1	0.2	0	0	0	0	0	0	0	0	1	0	0			0		2	0	0	0	0	0	0	0	0	0
38	256392	63	1	2	2	1			1	1		2	1	1	2	3				0		1	0		0	0	0	1	0	0	0	1	1	0	0			0		2	1	0	0	0	1	0	0	0	0
39	256393	40	1	0	2	5			3	4		2	30	2	0	3				0		1	0		0	0	1	1	0	0	0	1	1	0	0			0		2	1	0	1	0	1	0	0	0	0
40	256394	34	2	2	2	16	HOTEL MANAGER	60000	1	16	HOTEL MANAGER	3	22	3	2	3				0		1	0		0	0	0	1	1	0	0	0	1	0	0			0		2	0	0	0	0	1	0	0	0	0
41	256395	44	2	2	2	4		100000	2	4		2	240	1	2	3				1	240	1	0		1	0	1	1	0	0	0	0	1	0	0			0		2	0	0	0	0	0	0	0	0	0
42	256397	47	2	2	4	13		700000	2	13		4	32	1	2	3				0		1	0		0	0	1	1	0	1	1	0	1	0	0	PERFUMES		0		2	0	0	0	0	0	0	0	0	0
43	256398	54	2	2	3	1			1	1		2	54	3	2	3				0		1	1		0	0	0	1	0	0	0	0	1	0	0			0		0	0	0	0	0	1	0	0	0	0
44	256399	69	1	2	2	1			1	3		1	0	3	2	2	1	39	3	0		1	1	69	0	0	1	1	0	0	0	0	1	0	0			0		2	0	0	0	0	0	0	0	0	0
45	256400	37	2	2	2	16	COSMETIC SHOP		2	16	CLOTHES	3	29	1	0	3				0		1	1	18	0	0	0	1	0	0	0	1	1	0	0			0		2	1	0	0	0	0	0	0	0	0
46	256402	41	1	2	4	16	CASUAL LABOUR	150000	2	16	CASUAL LABOUR	2	6	1	2	3				1		1	0		1	1	1	1	0	0	0	1	1	0	0			0		0	0	0	0	0	0	0	0	0	0
47	256403	49	2	2	3	1			1	15		3	12	1	2	3				0		1	1	2	0	0	0	0	0	0	0	1	1	1	0		RODENTS	0		2	1	0	0	0	0	0	1	0	0
48	256404	36	2	2	2	1			1	16	HAIR DRESSER	2	18	2	2	3				0		1	0		1	0	0	1	0	1	0	0	1	0	0			0		2	0	0	0	0	0	0	0	0	0
49	256406	19	2	2	1	16	SHOP ATTENDANT	100000	2	11		3	17	1	2	3				0		1	0		1	0	0	1	0	0	0	1	1	0	0			0		2	1	0	0	0	0	0	0	0	0
50	256407	19	1	2	1	11			1	11		3	1	2	2	3				0		1	0		0	0	0	0	0	0	0	1	1	0	0			1	1	2	0	0	0	0	0	0	0	0	0
51	256409	24	1	2	1	4			2	11		4	24	2	2	3				1	24	1	0		0	0	1	0	0	0	0	1	1	0	0			0		2	1	0	0	0	1	0	0	0	0
52	256410	46	2	0	2	16	VENDOR		3	16	TAILOR	2	46	2	2	3				1	360	1	0		0	0	0	0	0	0	0	1	1	0	0			0		2	0	0	0	0	0	0	0	0	0
53	256411	28	2	2	1	4		150000	2	4		3	18	1	2	3				0		1	0		0	0	0	0	0	0	0	0	1	0	0			0		2	0	0	0	0	0	0	0	0	0
54	256413	30	2	2	1	16	COUNSOLLER	800000	1	16	COUNSOLLER	4	4	1	2	3				0		1	0		0	0	1	1	0	1	0	0	1	0	0			0		2	0	0	0	0	0	0	0	0	0
55	256414	63	1	2	4	1			1	2		2	63	3	2	3				0		0	1	63	0	1	1	0	0	1	0	0	1	0	0			0		2	0	0	0	0	1	0	0	0	0
56	256416	35	2	2	2	7		600000	1	7		4	32	1	2	3				1	84	1	0		0	0	0	0	0	0	1	1	1	0	0	DEODORANT		0		2	1	0	0	0	0	1	0	0	0
57	256426	32	1	2	2	1			1	16	BODABODA CYCLIST	3	32	1	2	3				0		0	0		0	0	1	1	0	0	0	1	1	0	0			0		2	0	0	0	0	1	0	0	0	0
58	256427	24	1	2	1	11			1	11		4	18	2	2	3				0		1	1	14	0	0	1	1	0	1	1	0	1	0	0	CHICKEN WASTE		0	90	2	0	0	0	0	0	0	0	0	0
59	256428	45	2	0	1	16	HOSTEL CLEARER	100000	3	16	HOSTEL CLEARER	2	37	1	2	3				0		1	0		0	1	0	1	0	0	0	0	1	0	0			0		2	0	0	0	0	0	0	0	0	0
60	256429	33	2	2	2	4		50000	2	4		1	33	1	2	3				0		1	0		0	0	1	1	0	0	0	0	1	0	0			0		2	0	0	0	0	0	0	0	0	0
61	256430	18	2	2	1	11			1	11		4	18	2	2	3				0		1	0		0	0	1	0	0	1	0	0	1	0	0			1	90	2	0	0	0	0	0	0	0	0	0
62	256432	53	2	0	3	1			1	2		2	16	3	2	3				1	60	1	0		0	0	0	0	0	0	0	1	1	0	0			0		2	1	0	0	0	1	0	0	0	0
63	256433	18	2	0	1	11			1	11		4	15	3	2	3				0		1	0		0	0	0	0	0	0	0	1	1	0	0			1	0	2	1	0	1	0	1	0	0	0	0
64	256434	60	2	2	4	1			1	1		1	60	1	2	3				1	480	1	1	59	0	0	1	1	0	0	0	0	1	0	0			0		2	0	0	0	0	1	0	0	0	0
65	256435	59	2	2	4	16	OUTSIDE CATERING		2	16	OUTSIDE CATERING	2	57	1	2	3				0		1	0		0	0	0	1	0	0	0	1	1	0	0			0		2	1	0	0	0	0	0	0	0	0
66	256436	60	2	2	3	3			3	3		1	50	2	0	3				0		1	1	49	0	0	1	1	0	0	0	1	1	0	0			0		2	0	0	1	0	1	0	0	0	0
67	256437	23	2	2	1	16	HOTEL WAITRESS	150000	1	16	HOTEL WAITRESS	2	23	3	2	3				0		1	0		0	0	0	1	0	0	0	0	1	0	0			0		2	0	0	0	0	0	0	0	0	0
68	256438	25	2	2	2	2			1	2		2	23	2	0	2	12	1	11	0		1	0		0	0	1	0	0	0	0	0	1	0	0			0		2	0	0	0	0	0	0	0	0	0
69	256439	26	2	2	2	4		100000	2	4		3	26	1	2	3				0		1	0		0	0	1	1	0	0	0	0	1	0	0			0		2	1	0	0	0	0	0	0	0	0
70	256440	41	1	2	2	1			1	1		2	2	1	2	2	1	21	17	0		1	0		0	0	1	0	0	0	0	1	1	0	0			0		2	1	0	0	0	0	1	1	0	0
71	256441	51	2	2	2	1			1	1		2	45	1	2	3				1	288	1	0		0	0	1	0	0	0	0	1	1	0	0			0		2	1	0	1	0	0	0	0	0	0
72	256442	54	2	2	2	2			1	2		3	54	3	0	3				0		1	0		0	1	0	1	0	1	0	0	1	0	0			0		2	0	0	0	0	0	0	0	0	0
73	256443	28	2	2	3	1			1	2		2	28	2	2	3				1	36	1	0		1	1	1	0	0	0	0	1	1	0	0			0		2	1	0	1	0	0	0	0	0	0
74	256444	38	2	2	4	1			1	2		2	15	1	2	3				0		1	1	6	0	0	0	0	0	0	0	1	1	0	0			0		2	1	0	0	0	1	0	1	0	0
75	256445	23	2	2	1	1			1	1		3	14	1	2	3				0		1	0		0	0	1	0	0	0	0	0	1	0	0			0		2	1	0	0	0	0	0	0	0	0
76	256447	27	2	2	1	1			1	1		3	27	1	2	3				0		1	0		0	0	0	1	0	0	0	0	1	0	0			0		2	0	0	0	0	0	0	0	0	0
77	256448	23	2	2	1	1			1	1		3	23	3	2	3				0		1	0		0	0	1	1	0	0	0	0	1	0	0			0		2	0	0	0	0	0	0	0	0	0
78	256449	24	2	2	1	1			1	16	SALOON	2	24	1	2	3				0		1	0		0	0	0	0	0	0	0	0	1	0	0			0		2	0	0	0	0	1	0	0	0	0
79	256450	52	2	2	4	4			2	4		3	52	3	0	3				0		1	0		0	0	1	1	0	0	0	0	1	0	0			0		2	0	0	0	0	0	0	1	0	0
80	256451	35	1	2	1	16	BLOKER		2	16	BLOKER	2	35	3	0	2		5	15	0		1	0		0	0	0	0	0	0	0	1	1	0	0			0		0	0	0	0	0	0	0	0	0	0
81	256452	45	1	2	2	1			1	1		3	45	1	2	3				0		1	0		0	0	1	1	0	0	0	1	1	0	0			0		2	0	0	0	0	0	0	0	0	0
82	256457	20	2	2	1	11			1	11		4	3	1	2	3				0		0	0		0	0	0	0	0	0	0	0	1	0	0			1	2	2	0	0	0	0	0	0	0	0	0
83	256458	30	2	2	2	4		700000	2	4		4	24	1	2	3				0		1	0		0	0	0	0	0	0	1	0	1	0	0	SPRAY		0		2	0	0	0	0	0	0	0	0	0
84	256459	41	1	2	2	3			3	3		3	27	1	2	3				0		1	0		1	1	1	1	0	0	0	1	1	0	0			0		2	1	0	0	0	1	0	0	0	0
85	256461	18	2	2	1	11			1	11		3	16	1	2	3				0		1	0		0	0	1	1	0	0	0	0	1	0	0			1	3	2	0	0	0	0	0	0	0	0	0
86	256462	20	2	2	1	16	HAIR DRESSER		2	16	HAIR DRESSER	3	19	1	2	3				0		1	0		1	0	0	0	0	0	0	1	1	0	0			0		2	1	0	0	0	0	0	0	0	0
87	256463	27	2	2	2	4		200000	2	4		3	27	3	2	3				0		1	0		0	0	0	1	0	0	0	0	1	0	0			0		2	0	0	0	0	0	0	0	0	0
88	256466	30	2	2	2	4		50000	2	4		3	30	2	2	3				0		1	0		0	0	0	1	0	0	0	0	1	0	0			0		2	0	0	0	0	0	0	0	0	0
89	256467	23	2	2	1	1			1	11		4	22	1	2	3				0		1	0		1	0	0	0	0	1	0	0	1	0	0			0		2	0	0	0	0	0	0	0	0	0
90	256469	51	2	2	1	14		500000	1	14		4	0.75	1	2	3				0		1	0		0	0	1	1	0	1	0	0	1	0	0			0		2	0	0	0	0	0	0	0	0	0
91	256470	57	2	2	4	1			1	16	FRUIT/JUICE VENDOR	2	57	2	2	3				0		1	0		0	0	1	1	0	0	0	1	1	0	0			0		2	0	0	0	0	0	0	1	0	0
92	256471	27	2	2	2	4		100000	2	4		2	27	1	2	3				0		1	0		0	0	0	1	0	0	0	0	1	0	0			0		2	0	0	0	0	0	0	0	0	0
93	256472	19	1	2	1	16	MECHANIC		2	16	MECHANIC	3	1	1	2	3				0		0	0		0	0	1	1	0	0	0	1	1	0	0			0		2	1	0	0	0	0	0	0	0	0
94	256473	39	2	2	1	15		250000	1	15		3	21	3	2	3				0		1	0		0	0	0	1	0	0	0	0	1	0	0			0		2	0	0	0	0	0	0	0	0	0
95	256474	30	2	2	1	16	TAILOR	700000	2	16	TAILOR	4	11	2	2	3				0		1	0		0	0	0	0	0	0	1	0	1	0	0	PERFUMES		1	5	2	0	0	0	0	0	0	0	0	0
96	256475	44	1	2	2	8		1500000	1	8		4	8	1	2	3				0		1	0		0	0	0	1	0	1	0	0	1	0	0			0		2	0	0	0	0	0	0	0	0	0
97	256476	24	2	2	2	15		600000	1	15		4	8	2	2	3				0		1	0		0	1	0	1	0	1	0	0	1	0	0			0		2	0	0	0	0	0	0	0	0	0
98	256477	24	1	2	1	15		200000	1	15		4	0.5	1	2	3				0		1	0		0	1	1	1	0	0	0	0	1	0	0			0		2	0	0	0	0	0	0	0	0	0
99	256478	60	1	2	2	3			3	3		1			0	2	20	41	10	0		1	1	30	1	1	1	1	0	0	0	1	1	0	0			0		2	0	0	0	0	1	0	0	0	0
100	256479	35	2	2	2	16	FOOD VENDOR		2	16	FOOD VENDOR	2	31	1	2	3				0		1	1	4	1	0	1	1	0	0	0	1	1	0	0			0		2	0	0	0	0	1	0	0	0	0
101	256480	40	2	0	1	16	FRIUT VENDOR		2	16	FRIUT VENDOR	3	33	1	0	3				0		1	0		1	0	0	1	0	0	0	1	1	0	0			0		2	1	0	0	0	0	0	0	0	0
102	256481	30	2	2	2	16	SHOP ATTENDANT		2	2		2	25	1	0	3				0		1	0		1	1	1	0	0	0	0	1	1	0	0			0		2	1	0	0	0	0	0	0	0	0
103	256482	41	2	2	2	4		500000	2	4		4	41	1	2	3				0		1	0		0	0	1	1	0	1	0	0	1	0	0			0		2	0	0	0	0	0	0	0	0	0
104	256483	60	2	2	2	1			1	16	TAILOR	2	60	3	2	3				0		1	0		0	1	1	1	0	1	0	0	1	0	0			0		2	0	0	0	0	0	0	0	0	0
105	256484	22	1	2	1	11			1	11		4	22	2	2	3				0		1	1	6	0	0	0	1	0	0	0	1	1	0	0			1	0	2	1	0	0	0	0	0	0	0	0
106	256485	26	2	0	1	1			1	1		2	21	1	2	3				0		1	0		0	0	1	0	0	1	0	0	1	0	0			0		2	0	0	0	0	0	0	0	0	0
107	256486	67	2	2	2	16	RETIRED		1	13		4	40	1	0	3				0		1	0		0	0	0	1	0	1	0	0	1	0	0			0		2	0	0	0	0	0	0	0	0	0
108	256487	32	2	2	2	16	40000	40000		16	TAILOR	2	22	1	2	3				0		1	0		1	0	0	0	0	0	0	0	1	0	0			0		2	0	0	0	0	0	0	0	0	0
109	256488	42	2	2	2	4		600000	2	4		3	5	1	2	3				0		1	0		1	1	1	1	0	0	0	0	1	0	0			0		2	0	0	0	0	0	0	0	0	0
110	256489	25	1	2	1	11			1	11		4	4	1	2	3				0		0	0		1	0	1	1	0	0	0	0	1	0	0			1	0	2	1	0	0	0	1	0	0	0	0
111	256490	18	2	2	1	11			1	11		4	18	1	2	3				0		1	1		0	0	0	1	0	0	0	1	1	0	0			1	0	2	1	0	0	0	1	0	0	0	0
112	256491	67	2	2	3	3			3	3		2	50	3	0	3				0		1	0		0	0	0	1	0	0	1	0	1	0	0	SMOKE		0		2	0	0	0	0	0	0	0	0	0
113	256492	36	2	2	2	2			1	2		2	35	3	0	3				0		1	0		0	0	0	1	0	0	0	0	1	0	0			0		2	0	0	0	0	0	0	0	0	0
114	256494	36	2	2	2	4		30000	2	4		2	36	3	2	3				0		1	0		0	0	0	1	0	0	0	0	1	0	0			0		2	0	0	0	0	0	0	0	0	0
115	256495	50	2	2	2	3			3	3		2	30	2	0	2	10	21	20	0		1	1	50	1	1	1	0	0	0	1	0	1	0	0	SMOKE		0		2	0	0	0	0	1	0	0	0	0
116	256496	21	2	2	1	1			1	11		3	20	1	2	3				0		1	0		0	0	1	0	0	1	0	0	1	0	0			0		2	0	0	0	1	0	0	0	0	0
117	256497	26	2	2	1	11			1	11		4	25	1	2	3				0		1	0		1	0	1	0	0	0	0	0	1	0	0			1	0	2	1	0	0	0	0	0	0	0	0
118	256498	20	1	2	1	11			1	11		4	8	3	2	3				0		0	0		0	1	0	0	0	1	0	0	1	0	0			1	0	2	0	0	0	0	0	0	0	0	0
119	256499	60	2	2	4	16	POULTRY FARMER		3	16	HOTEL VENDOR	3	17	1	0	3				0		1	0		0	0	1	1	0	0	0	1	1	0	0			0		2	1	0	0	0	1	1	0	0	0
120	256500	20	2	2	1	11			1	11		4	15	1	2	3				0		1	0		0	0	0	1	0	0	0	1	1	0	0					0	1	0	0	0	0	0	0	0	0
121	256501	23	2	2	1	11			1	11		4	1	1	2	3				0		1	1	10	0	0	1	1	0	0	0	0	0	0	0			1	1	2	1	0	0	0	1	0	0	0	0
122	256502	40	1	2	2	4		300000	2	4		3	40	3	2	3				0		0	0		0	0	0	1	0	0	0	0	1	0	0			0		2	1	0	0	0	0	0	0	0	0
123	256503	32	2	2	2	1			1	4		2	25	1	2	3				0		1	0		0	0	0	0	0	0	0	0	1	0	0			0		2	0	0	0	0	0	0	0	0	0
124	256504	23	2	2	1	7		300000	1	7		4	12	1	2	3				0		1	0		0	0	1	1	0	1	0	0	1	0	0			0		2	0	0	0	0	0	0	0	0	0
125	256507	20	2	2	1	11			1	11		3	19	2	2	3				0		1	0		0	0	1	1	0	0	0	0	1	0	0			0		2	0	0	0	0	0	0	0	0	0
126	256508	27	2	2	1	4		150000	2	4		3	10	1	2	3				0		1	0		0	0	0	0	1	0	0	0	1	0	0			0		2	1	0	0	0	0	0	0	0	0
127	256509	37	2	0	2	4		150000	2	4		3	37	1	2	3				0		1	0		1	1	1	1	0	0	0	0	1	0	0			0		2	1	0	0	0	0	0	0	0	0
128	256510	62	2	2	2	1			1	1		3	62	1	2	3				0		1	0		1	0	0	1	0	1	0	0	1	0	0			0		2	0	0	0	0	0	0	0	0	0
129	256511	41	2	2	2	2			1	2		2	35	2	2	3				0		1	0		0	0	0	0	0	0	1	0	1	0	0	SMOKE		0		2	0	0	0	0	0	0	1	0	0
130	256512		2	0	4	1			1	16	HAIR DRESSER	3	1	2	2	3				0		1	0		0	0	0	0	0	0	0	1	1	0	0			0		2	1	0	0	0	1	0	0	0	0
131	256515	23	1	2	1	14		210000	1	14		4	3	1	2	3				0		1	0		0	0	1	0	0	0	1	0	1	0	0	VASELINE		1	6	2	0	0	0	0	0	0	0	0	0
132	256516	34	2	2	1	16	TAILOR	100000	2	16	TAILOR	3	9	3	2	3				0		0	0		0	0	1	0	0	1	0	0	1	0	0			0		2	0	0	0	0	0	0	0	0	0
133	256517	59	2	2	4	3			3	3		2	39	1	0	3				0		1	0		1	0	1	0	1	0	0	0	1	0	0			0		2	0	0	0	0	0	0	1	0	0
134	256520	49	2	2	3	4		500000	2	4		3	49	1	2	3				0		1	0		0	0	0	1	0	0	0	0	1	0	0			0		2	0	0	0	0	0	0	1	0	0
135	256521	34	2	2	2	2			1	2		4	10	1	0	3				0		1	0		0	0	0	0	0	0	0	0	1	0	0			0		2	0	0	0	0	0	0	0	0	0
136	256522	31	2	2	2	7		200000	1	11		4	20	1	2	3				0		1	0		0	0	1	1	0	1	0	0	1	0	0			0		2	0	0	0	0	0	0	0	0	0
137	256523	35	2	2	1	1			1	16	HAIR DRESSER	2	30	1	2	3				0		1	0		0	0	1	0	0	0	0	1	1	0	0			0		2	1	0	0	0	0	0	0	0	0
138	256524	56	2	2	2	2			1	2		2	56	2	2	3				0		1	0		0	0	1	0	0	0	0	0	1	0	0			0		2	0	0	0	0	0	0	0	0	0
139	256525	26	2	2	2	4		100000	2	4		3	26	3	2	3				0		1	0		0	0	0	1	0	0	0	0	1	0	0			0		2	0	0	0	0	0	0	0	0	0
140	256526	25	2	2	2	2			1	2		3	20	3	2	3				0		1	0		0	0	0	0	0	0	0	0	1	0	0			0		2	0	0	0	0	0	0	0	0	0
141	256527	47	2	2	2	3			3	3		2	47	2	2	3				0		1	1	6	0	0	0	1	0	0	0	1	1	0	0			0		2	1	0	0	0	1	0	0	0	0
142	256528	21	1	2	1	4		600000	2	4		3	5	1	2	3				0		1	0		0	0	1	0	0	1	0	0	1	0	0			0		2	0	0	0	0	0	0	0	0	0
143	256530	21	2	2	2	2			1	2		2	18	2	0	3				0		1	0		1	0	1	1	0	1	0	0	1	0	0			0		2	1	0	1	0	0	0	0	0	0
144	256531	34	2	2	2	16	SHOP KEEPER		2	2		3	5	1	2	3				0		1	1	3	1	0	1	1	0	0	0	1	1	0	0			0		2	1	0	0	0	1	0	0	0	0
145	256535	34	2	2	2	2			1	2		2	22	1	2	3				0		1	0		0	1	1	1	0	0	0	1	1	0	0			0		2	1	0	0	0	1	0	0	0	0
146	256536	27	2	2	2	4		100000	2	4		3	27	1	2	3				0		1	0		0	0	0	1	0	1	0	0	1	0	0			0		2	0	0	0	0	0	0	0	0	0
147	256537	43	2	2	2	4		200000	2	4		4	43	1	2	3				0		1	0		0	1	1	1	0	0	0	0	1	0	0			0		2	1	0	0	0	0	0	0	0	0
148	256539	48	2	2	1	4		150000	2	4		4	32	2	2	3				0		1	0		0	0	1	1	0	1	0	0	1	0	0			0		2	0	0	0	0	0	0	0	0	0
149	256540	22	2	2	1	16	RECEPTIONIST	200000	2	11		4	1	1	2	3				0		1	0		0	0	0	0	0	0	1	0	0	0	0	PERFUMES		0		2	1	0	0	0	0	0	0	0	0
150	256541	21	2	2	1	11			1	11		4	1	1	2	3				0		1	0		0	0	0	1	0	1	0	1	1	0	0			1	1	2	1	0	0	0	0	0	0	0	0
151	256542	31	2	2	2	7		410000	1	7		4	31	1	2	3				0		1	0		0	0	1	1	0	0	0	0	1	0	0			0		2	0	0	0	0	0	0	0	0	0
152	256543	19	1	2	1	16	MANUAL LABOUR	50000	2	1		3	0.5	2	2	3				0		1	0		0	0	0	1	0	0	0	0	1	0	0			1	0	2	1	0	0	0	0	0	0	0	0
153	256544	20	2	2	1	11			1	11		4	15	1	2	3				0		1	0		0	0	0	0	0	0	0	0	1	0	0			1	0	2	0	0	0	0	0	0	0	0	0
154	256545	47	2	2	2	2			1	2		2	30	1	0	3				0		1	0		1	1	1	1	0	1	0	0	1	0	0			0		2	0	0	0	0	0	0	0	0	0
155	256546	22	1	2	2	11			1	11		4	12	1	2	3				0		1	0		0	0	1	1	0	0	0	1	1	0	0			1	0	2	1	0	0	0	0	0	0	0	0
156	256548	40	2	2	2	1			1	16	SOLD CHARCOAL	2	35	1	2	3				0		1	0		0	0	0	1	0	0	0	0	1	0	0			0		2	1	0	0	0	1	1	0	0	0
157	256549	34	2	2	2	16	SALES 2ND HAND CLOTHES		2	16	PASION FRUITS	2	32	2	2	3				0		0	0		0	0	1	0	0	0	0	1	1	0	0			0		2	1	0	1	0	0	0	0	0	0
158	256550	57	2	2	4	4		200000	2	4		2	22	2	2	3				0		1	0		1	0	0	1	0	0	0	0	1	0	0			0		2	0	0	0	0	0	0	0	0	1
159	256551	62	2	2	2	2			1	2		2	23	2	0	3				0		1	1	20	1	0	1	1	0	1	0	0	1	0	0			0		2	0	0	0	0	0	0	0	0	0
160	256552	17	2	0	1	16	TAILOR		2	11		3	16	1	0	3				0		1	1	2	1	0	1	0	0	0	0	1	1	0	0			0		2	1	0	0	0	0	0	0	0	0
161	256553	45	2	2	3	7		400000	1	7		4	45	2	2	3				0		1	0		1	1	0	0	0	1	0	0	1	0	0			0		2	0	0	0	0	0	0	0	0	0
162	256554	46	2	2	2	13			2	13		4	46	2	0	3				0		1	0		0	0	1	0	0	0	0	0	1	0	0			0		2	0	0	0	0	0	0	0	0	0
163	256555	47	2	2	4	1			1	4		1	30	1	2	3				0		1	0		0	0	0	0	0	0	0	0	1	0	0			0		2	0	0	1	0	0	0	0	0	0
164	256556	57	2	2	3	12		200000	3	12		1	37	3	2	3				0		1	0		0	0	0	1	0	0	1	0	1	0	0	PERFUME		0		2	0	0	0	0	0	0	0	0	0
165	256557	30	1	2	1	11			1	11		4	14	1	2	3				0		0	0		0	0	0	0	0	0	0	1	1	0	0			1	0	2	0	0	0	0	0	0	0	0	0
166	256558	26	1	2	1	16	MECHANIC		2	11		3	1	1	0	3				0		1	1	3	0	0	0	1	0	0	0	1	1	0	0			0		2	1	0	0	0	1	0	0	0	0
167	256560	35	1	2	2	3			3	3		2	32	1	2	3				0		1	0		0	0	0	1	0	0	0	0	1	0	0			0		2	0	0	0	0	0	0	0	0	0
168	256561	29	2	2	2	7		550000	1	7		4	29	3	2	3				0		1	0		0	0	0	0	0	0	1	0	1	0	0			0		0	0	0	0	0	0	0	0	0	0
169	256562	38	2	2	3	3			3	3		3	15	1	2	3				0		1	0		0	0	0	1	0	0	0	0	1	0	0			0		2	0	0	0	0	0	0	0	0	0
170	256563	31	2	2	2	2			1	2		3	29	2	0	3				0		1	0		0	1	1	0	0	0	0	1	1	0	0			0		2	1	0	0	0	1	0	0	0	0
171	256564	27	2	2	1	16	IMMIGRATION OFFICE	270000	1	16	IMMIGRATION OFFICER	4	6	1	2	3				0		1	0		0	0	0	1	0	1	0	0	1	0	0			0		2	0	0	0	0	1	0	0	0	0
172	256565	40	1	2	2	16	DRIVER	100000	3	16	DRIVER	2	33	1	2	2	15	121	10	0		1	0		0	0	0	1	0	1	0	0	1	0	0			0		2	0	0	0	0	0	0	0	0	0
173	256566	36	2	2	2	2			1	2		2	36	2	2	3				0		1	0		0	0	1	1	0	0	0	1	1	0	0			0		2	0	0	0	0	0	0	0	0	0
174	256567	39	2	2	2	13			2	13		4	46	2	0	3				0		0	0		0	0	0	1	0	1	0	0	1	0	0			0		2	0	0	0	0	0	0	1	0	0
175	256568	37	2	2	3	4		150000	2	4		2	37	2	2	3				0		0	1	37	1	1	1	1	0	0	0	0	1	0	0			0		2	0	0	0	0	0	0	0	0	0
176	256569	57	1	2	2	16	SHOE SELLER		1	16	HAWKER	1	56	1	0	3				0		1	0		0	0	0	0	0	0	0	1	1	0	0			0		2	1	0	0	0	1	0	0	0	0
177	256570	27	2	2	2	3			3	3		4	26	2	0	3				0		1	0		1	1	1	1	0	0	0	1	1	0	0			0		2	1	0	0	0	0	1	0	0	0
178	256571	52	2	2	2	16	2ND HAND CLOTHES		2	1		2	50	2	2	3				0		1	1	1	0	0	1	1	0	0	0	1	1	0	0			0		2	1	0	0	0	0	0	0	0	0
179	256572	55	1	2	2	16	FARMER	200000	3	16	FARMER	3	49	1	2	3				0		1	0		0	1	1	0	0	1	1	0	1	0	0	PESTICIDES		0		2	1	0	0	0	0	0	0	0	0
180	256574	21	2	2	1	1			1	16	SHOP ATTENDANT	3	21	1	2	3				0		1	0		1	0	1	1	0	1	0	0	1	0	0			0		2	0	0	0	0	1	0	0	0	0
181	256575	38	2	2	2	16	DRY CLEANER	250000	3	16	DRY CLEANER	2	8	1	2	3				0		1	0		0	0	0	1	0	1	0	0	1	0	0			0		2	0	0	0	0	1	0	0	0	0
182	256576	43	2	2	1	11			1	11		4	1	1	2	3				0		1	0		1	0	0	1	0	1	1	1	1	0	0	PERFUMES		1	21	2	1	0	0	0	1	0	0	0	0
183	256577	68	2	2	2	1			1	4		1	58	1	2	3				0		1	0		0	1	1	1	0	0	0	1	0	0	0			0		2	0	0	0	0	0	0	0	0	0
184	256578	34	2	2	1	1			1	13		4	34	1	2	3				0		1	0		0	0	1	1	0	1	0	0	1	0	0			0		2	0	0	0	0	0	0	0	0	0
185	256579	50	1	2	2	4			2	4		2	30	1	0	3				0		1	0		0	0	1	1	0	0	0	1	1	0	0			0		2	1	0	0	0	1	0	1	0	0
186	256580	17	2	2	1	4			2	4		3	9	1	2	3				0		1	1	6	0	0	1	1	0	1	1	0	1	0	0	SMOKE		0		2	0	0	0	0	1	0	0	0	0
187	256581	54	2	2	3	16	CLOTHES VENDOR		2	2		2	50	1	2	3				0		1	0		0	0	0	1	0	0	0	1	1	0	0			0		2	0	0	0	0	1	0	0	0	0
188	256582	41	2	2	2	2			1	2		2	40	2	2	3				0		1	0		0	0	0	1	0	0	0	1	1	0	0			0		2	1	0	0	0	0	0	0	0	0
189	256583	49	2	2	2	2			1	2		3	39	1	2	3				0		1	0		0	0	0	1	0	0	0	0	1	0	0			0		2	0	0	0	0	0	0	0	0	0
190	256584	57	1	2	2	16	TAILOR	200000	2	16	TAILOR	3	52	1	2	2	5	21	10	0		0	0		0	0	0	1	0	0	0	0	1	0	0			0		2	0	0	0	0	0	0	1	0	0
191	256585	34	2	2	2	4			2	4		2	26	1	2	3				0		1	0		1	1	1	1	0	1	0	0	1	0	0			0		2	0	0	0	0	0	0	1	0	0
192	256587	29	1	2	1	16	RADIO PRESENTER	670000	1	11		4	29	1	2	3				0		1	0		1	0	0	0	0	0	0	1	1	0	0			0		2	0	0	0	0	0	0	0	0	0
193	256588	19	2	2	1	11			1	11		3	19	1	2	3				0		1	0		0	0	1	1	0	0	0	0	1	0	0			1	0	2	0	0	0	0	0	0	0	0	0
194	256590	27	2	2	1	4		50000	2	4		2	20	1	2	2	0.3	11	3	0		1	0		1	1	0	1	0	1	0	0	1	0	0			0		2	0	0	0	0	0	0	0	0	0
195	256591	40	2	2	3	16	MAID	100000	3	16	100000	3	40	2	2	3				0		1	0		0	1	0	1	0	1	0	0	1	0	0			0		2	0	0	0	0	0	0	1	0	0
196	256594	23	2	2	1	11			1	11		4	21	1	2	3				0		1	0		1	0	0	1	0	0	0	0	1	0	0			1	0	2	0	0	0	0	0	0	0	0	0
197	256595	29	2	2	2	9		340000	2	9		4	28	1	2	3				0		1	1	3	0	0	0	1	0	0	0	1	1	0	0			0		2	1	0	1	0	0	0	0	0	0
198	256596	18	1	2	1	1			1	1		4	5	1	2	3				0		1	0		0	0	0	1	0	0	0	0	1	0	0			0		2	0	0	0	0	0	0	0	0	0
199	256597	52	2	2	2	13		400000	2	13		4	5	1	2	3				0		1	0		0	0	1	1	0	0	0	0	1	0	0			0		2	0	0	0	0	0	0	0	0	0
200	256598	26	2	2	2	16	SALOON	250000	2	16	SALOON	3	26	2	2	3				0		1	0		0	0	0	1	0	1	1	0	1	0	0	HAIR SPRAY		0		2	0	0	0	0	0	0	0	0	0
201	256599	41	2	2	2	4		500000	2	4		3	41	1	2	3				0		1	0		1	0	0	1	0	0	0	0	1	0	0			0		2	1	0	0	0	1	0	0	0	0
202	256600	23	2	2	1	1			1	11		4	23	2	2	3				0		1	1	1	0	0	0	1	0	0	0	1	1	0	0			0		2	1	0	0	0	0	0	0	0	0
203	256601	27	2	2	1	15		130000	1	15		2	27	2	2	3				0		1	0		0	0	0	1	0	1	0	0	1	0	0			0		2	0	0	0	0	0	0	0	0	0
204	256603	24	2	0	1	1			1	1		2	21	1	2	3				0		1	0		0	0	0	1	0	0	0	1	1	0	0			0		2	1	0	0	0	1	1	0	0	0
205	256604	46	2	2	2	15			1	15		4	45	2	2	3				0		1	0		0	0	0	1	0	0	0	1	1	0	0			0		2	0	0	0	0	0	0	0	0	0
206	256606	35	2	2	1	15		150000	1	15		3	32	1	2	3				0		1	0		1	1	1	1	0	1	0	0	1	0	0			0		2	0	0	0	0	0	0	0	0	0
207	256607	24	2	2	1	11			1	11		4	15	1	2	3				0		1	0		0	0	1	0	0	0	0	0	1	0	0			1	0	2	0	0	0	0	1	0	0	0	0
208	256608	51	2	2	2	16	CRAFT	800000	1	16	CRAFT	3	1	2	2	3				1	360	1	1	20	1	0	1	1	0	0	0	1	1	0	0			0		2	1	0	0	0	0	0	0	0	0
209	256609	54	2	2	2	4		100000	2	4		3	36	1	2	3				0		1	0		1	1	0	1	0	1	1	0	1	0	0	SMOKE		0		2	0	0	0	0	0	0	0	0	0
210	256610	24	2	2	1	1			1	11		3	20	1	2	3				0		1	1	7	1	1	0	0	0	0	0	1	1	0	0			0		2	0	0	0	0	0	0	0	0	0
211	256613	50	2	2	2	7			1	7		4	2	1	2	3				0		1	0		0	0	0	0	0	0	0	1	1	0	0			0		2	1	0	0	0	0	0	0	0	0
212	256614	21	2	2	1	11			1	11		3	9	1	2	3				0		1	0		0	0	0	1	0	0	0	1	1	0	0			1	0	2	0	0	0	0	0	0	0	0	0
213	256615	19	2	2	1	11			1	11		3	0.5	1	2	3				0		0	0		0	0	0	1	0	0	0	0	1	0	0			1	14	2	0	0	0	0	0	0	0	0	0
214	256616	40	2	2	2	13			2	13		4	36	1	2	3				0		1	0		0	0	0	0	0	0	0	1	1	0	0			0		2	0	0	0	0	1	0	0	0	0
215	256617	46	1	2	2	16	PAINTER	250000	3	16	PAINTERS	3	46	2	2	2	4	20	5	0		1	0		0	0	0	1	0	0	1	0	1	0	0	PAINT		0		2	0	0	0	0	0	0	0	0	0
216	256618	25	2	2	1	15		200000	1	15		4	0.5	1	2	3				0		0	0		0	0	0	1	0	0	0	0	1	0	0			0		2	0	0	0	0	0	0	0	0	0
217	256619	28	2	2	1	15		200000	1	15		4	6		0	3				0		0	0		0	0	0	1	0	0	0	0	1	0	0			0		2	0	0	0	0	0	0	0	0	0
218	256620	21	1	2	1	11			1	11		3	1	1	2	3				0		1	0		0	0	0	1	0	0	0	1	1	0	0			1	0	2	1	0	0	0	0	0	0	0	0
219	256621	18	1	2	1	11			1	11		3	0.5	1	2	3				0		0	0		1	0	0	0	0	0	0	0	1	0	0			1	0	2	0	0	0	0	0	0	0	0	0
220	256622	18	2	2	1	11			1	11		3	16	2	2	3				0		0	0		1	0	1	1	0	1	0	0	1	0	0			0		2	0	0	0	0	0	0	0	0	0
221	256624	28	1	2	1	7		200000	1	7		4	25	1	2	3				0		1	0		0	0	1	0	0	1	0	0	1	0	0			0		2	0	0	0	0	0	0	0	0	0
222	256625	42	2	2	3	16	CHARCOAL VENDOR		3	2		2	39	3	2	2	3	31	4	0		1	0		0	0	0	1	0	0	0	1	1	0	0			0		2	0	0	1	0	1	0	0	0	0
223	256626	22	1	2	1	4		100000	2	4		3	17	2	2	3				0		0	0		0	0	1	1	0	1	0	0	1	0	0			0		2	0	0	0	0	1	0	0	0	0
224	256627	36	2	2	2	7		1000000	1	7		4	36	1	2	3				0		0	0		0	0	0	1	0	0	0	0	1	0	0			0		2	0	0	0	0	1	0	0	0	0
225	256628	35	2	2	2	4		50000	2	4		3	35	2	2	3				0		1	0		0	0	0	1	0	0	0	0	1	0	0			0		2	0	0	0	0	0	0	0	0	0
226	256629	18	2	2	1	11			1	11		3	16	1	2	3				0		1	0		0	0	0	1	0	0	0	0	1	0	0			1	0	2	1	0	0	0	0	0	0	0	0
227	256631	59	2	2	4	16	CLEANER	50000	3	16	CLEANER	2	51	1	2	3				0		1	0		0	1	0	0	0	0	0	0	1	0	0			0		2	0	0	0	0	1	0	0	0	0
228	256632	19	2	2	1	11			1	11		3	0.5	1	2	3				0		1	0		0	1	1	1	0	0	0	0	1	0	0			1	1	2	0	0	0	0	1	0	0	0	0
229	256633	28	2	2	1	7		600000	1	7		4	0.5	1	2	3				0		1	0		0	0	0	1	0	0	0	0	1	0	0			0		2	1	0	0	0	0	0	0	0	0
230	256634	30	2	2	2	1			1	1		2	29	3	2	3				1		0	0		0	0	0	1	0	0	0	0	1	0	0			0		2	1	0	0	0	0	0	0	0	0
231	256635	19	2	2	1	11			1	11		3	3	3	2	3				0		0	0		1	1	1	1	0	1	0	0	1	0	0			1	0	2	0	0	0	0	0	0	0	0	0
232	256636	59	2	2	2	4		20000	2	4		2	40	1	2	3				0		1	0		1	0	0	0	0	0	0	0	1	0	0			0		2	0	0	0	0	0	0	0	0	0
233	256637	44	2	2	3	4			2	2		2	15	1	2	3				0		1	1	1	1	0	0	1	0	0	0	1	1	0	0			0		2	0	0	1	0	0	0	0	0	0
234	256639	25	2	2	2	4		80000	2	4		3	20	2	2	3				0		1	0		0	0	0	1	0	1	0	0	1	0	0			0		2	0	0	0	0	0	0	0	0	0
235	256640	39	2	2	4	16	TAILOR	180000	2	16	TAILOR	2	30	1	2	3				1	240	1	0		1	0	0	1	0	0	0	0	1	0	0			0		2	0	0	0	0	0	0	0	0	0
236	256641	33	1	2	2	4			2	4		3	1	1	2	3				0		1	0		0	0	0	0	0	0	0	1	1	0	0			0		2	0	0	0	0	1	0	0	0	0
237	256642	19	2	2	1	11			1	11		3	19	2	2	3				0		1	0		1	0	1	1	0	0	0	0	1	0	0			1	0	2	0	0	0	0	0	0	0	0	0
238	256643	47	2	2	4	1			1	1		2	46	2	2	3				0		1	0		1	0	1	1	0	0	0	0	1	0	0			0		2	0	0	0	0	0	0	1	0	0
239	256644	35	2	2	2	16	HOUSE HELPER	150000	3	16	HOUSE HELPER	2	32	1	2	3				0		0	0		0	1	1	1	0	0	0	0	1	0	0			0		2	0	0	0	0	0	0	0	0	0
240	256645	70	2	2	4	3			3	3		2	70	3	2	3				0		1	0		1	0	1	1	0	0	0	0	1	0	0			0		2	0	0	0	0	0	0	0	0	0
241	256646	30	2	2	2	15		600000	1	15		4	25	1	2	3				0		1	0		0	0	0	1	0	0	0	1	1	0	0			0		2	1	0	0	0	0	0	0	0	0
242	256647	70	2	2	4	1			1	2		1	62	2	2	2	40	51	1	1	24	1	0		0	0	0	0	0	0	0	1	1	0	0			0		2	0	0	0	0	0	0	0	0	0
243	256648	46	2	2	2	4		100000	2	4		2	44	3	2	3				0		0	0		0	0	1	1	0	0	0	0	1	0	0			0		2	0	0	0	0	0	0	0	0	0
244	256650	37	2	2	2	4		20000	2	4		3	22	1	2	3				0		1	0		0	0	0	1	0	0	0	0	1	0	0			0		2	0	0	0	0	0	0	0	0	0
245	256651	70	2	2	3	1			1	2		2	1	1	2	3				0		1	1	20	0	0	0	1	0	0	0	1	1	0	0			0		2	0	0	1	0	0	0	0	0	0
246	256652	25	1	2	2	5		200000	3	5		3	25	3	2	3				0		1	0		1	1	1	1	0	1	0	0	1	0	0			0		2	0	0	0	0	0	0	0	0	0
247	256655	52	2	2	3	16	CHARCOAL VENDOR		3	2		2	1	1	2	3				0		1	0		0	0	0	1	0	0	0	1	1	0	0			0		2	0	0	1	0	1	0	0	0	0
248	256657	35	2	2	2	4		200000	2	4		4	35	2	2	3				0		1	0		0	0	1	1	0	0	0	1	1	0	0			0		2	0	0	0	0	0	0	0	0	0
249	256658	47	2	2	2	2			1	2		2	47	1	0	3				0		1	0		0	0	1	1	0	0	0	0	1	0	0			0		2	0	0	0	0	0	0	0	0	0
250	256659	38	2	2	2	4		100000	2	4		2	38	2	2	3				0		1	0		1	0	0	1	0	0	1	0	1	0	0			0		2	0	0	0	0	0	0	0	0	0
251	256660	44	1	2	2	16	BODA CYCLIST		3	16	BODA CYCLIST	2	1	1	2	3				0		1	0		0	0	0	1	0	0	0	1	1	0	0			0		2	1	0	0	0	0	0	0	0	0
252	256661	43	2	2	2	2			1	2		1	0.5	1	2	3				0		1	0		0	0	0	1	0	0	0	0	1	0	0			0		2	0	0	0	0	0	0	1	0	0
253	256662	61	1	2	2	4		300000	2	4		3	59	2	2	3				0		1	0		1	1	0	0	0	1	0	0	1	0	0			0		2	0	0	0	0	0	0	0	0	0
254	256663	21	2	2	1	11			1	11		3	17	1	2	3				0		1	0		1	0	1	0	0	0	0	0	0	0	0			1	7	2	1	0	0	0	0	0	0	0	0
255	256664	30	2	0	2	2			1	2		4	15	3	0	3				0		1	0		1	1	1	0	0	0	0	0	1	0	0			0		2	1	0	0	0	0	0	0	0	0
256	256665	19	2	2	1	11			1	11		3	16	3	2	3				0		1	0		0	1	0	1	0	0	0	0	1	0	0			1	3	2	0	0	0	0	0	0	0	0	0
257	256666	25	1	2	1	4		100000	2	11		4	0.5	1	2	3				0		1	0		0	0	0	1	0	0	0	0	1	0	0			0		2	0	0	0	0	0	0	0	0	0
258	256667	29	1	2	2	9		390000	2	9		3	29	3	2	3				0		1	0		1	1	0	1	0	1	0	0	1	0	0			0		2	0	0	0	0	0	0	0	0	0
259	256668	38	2	2	2	4		50000	2	4		2	33	1	2	3				0		1	0		1	0	1	0	0	0	0	0	1	0	0			0		2	0	0	0	0	0	0	0	0	0
260	256669	19	1	2	1	11			1	11		3	19	1	2	3				0		1	0		1	1	1	1	0	1	0	0	1	0	0			1	0	2	0	0	0	0	0	0	1	0	0
261	256670	25	2	2	2	4		200000	2	4		4	1	1	2	3				0		1	0		0	0	0	1	0	1	0	0	1	0	0			0		2	0	0	0	0	0	0	0	0	0
262	256671	29	1	2	2	16	PROPERTY BROKER	200000	2	16	PROPERTY BROKER	3	24	1	2	3				0		1	0		0	0	1	1	0	0	0	0	1	0	0			0		2	0	0	0	0	0	0	0	0	0
263	256672	19	2	0	1	11			1	11		3	18	1	2	3				0		1	0		0	1	1	1	0	1	0	0	1	0	0			1	7	2	0	0	0	0	0	0	0	0	0
264	256673	53	2	2	3	3			3	3		2	53	1	2	2	0.5	1	20	0		1	0		0	0	1	1	0	0	0	0	1	0	0			0		2	0	0	0	0	0	0	0	0	0
265	256674	36	2	2	2	4		250000	2	4		2	36	2	2	3				0		1	0		0	0	0	1	0	0	0	0	1	0	0			0		2	0	0	0	0	1	0	0	0	0
266	256675	29	2	2	1	1			1	15		4	15	3	2	3				0		1	0		0	0	0	1	0	1	0	0	1	0	0			0		2	0	0	0	0	0	0	0	0	0
267	256677	27	2	2	2	2			1	2		2	12	1	2	3				0		1	0		0	0	1	1	0	1	0	1	0	0	0			0		2	0	0	0	0	0	0	0	0	0
268	256679	22	2	2	1	16	SALES CLOTHES		2	16	CLOTHES	3	20	1	2	3				0		1	1	1	0	0	0	1	0	0	0	1	1	0	0			0		2	0	0	0	0	1	0	0	0	0
269	256680	25	2	2	1	13		300000	2	11		4	15	3	2	3				0		1	0		1	0	0	1	0	1	0	1	1	0	0			0		2	0	0	0	0	0	0	0	0	0
270	256681	21	2	2	1	1			1	1		4	7	3	2	3				0		1	0		0	1	1	1	0	1	0	0	1	0	0			0		2	0	0	1	0	0	0	0	0	0
271	256683	28	2	2	2	1			1	1		2	28	3	2	3				0		1	0		0	1	1	1	0	1	0	0	1	0	0			0		2	0	0	0	0	0	0	0	0	0
272	256684	23	1	2	1	1			1	11		4	18	3	2	2	0.02	11	4	0		1	0		0	1	1	1	0	1	0	1	1	0	0			0		2	1	0	0	0	0	0	0	0	0
273	256685	43	1	2	2	4		800000	2	4		4	39	3	2	3				0		1	0		0	0	0	1	0	1	0	1	1	0	0			0		2	0	0	0	0	0	0	0	0	0
274	256686	43	1	2	2	16	BODA BODA CYCLIST	600000	3	16	BODA BODA CYCLIST	2	41	2	2	3				0		1	0		0	0	0	1	0	1	0	1	1	0	0			0		2	0	0	0	0	0	0	1	0	0
275	256687	19	2	0	1	11			1	11		3	12	3	2	3				0		1	0		0	0	0	0	0	0	0	1	1	0	0			1	0	2	1	0	0	0	0	0	0	0	0
276	256688	29	2	2	2	2			1	2		3	5	1	0	3				0		1	0		0	0	1	0	0	1	0	0	1	0	0			0		2	0	0	0	0	1	0	0	0	0
277	256689	46	2	2	3	1			1	2		3	1	1	2	3				0		1	1	5	0	0	0	0	0	0	0	1	1	1	0			0		2	1	0	1	0	0	0	0	0	0
278	256690	22	2	0	1	11			1	11		4	12	1	2	3				0		1	0		0	0	0	1	0	0	0	0	1	0	0			1	1	2	0	0	0	0	0	0	0	0	0
279	256691	19	2	2	1	4		100000	2	4		3	5	1	2	3				0		1	0		0	0	0	1	0	0	0	0	1	0	0			0		2	0	0	0	0	0	0	0	0	0
280	256692	23	2	2	1	11			1	11		4	17	3	2	3				0		1	0		0	0	0	0	0	0	0	1	1	0	0			1	0	2	0	0	0	0	1	0	0	0	0
281	256694	24	1	0	1	11			1	11		4	0.6	1	2	3				0		1	0		0	0	1	1	0	0	0	0	1	0	0			1	3	2	0	0	0	0	0	0	0	0	0
282	256695	35	2	2	2	4		100000	2	4		2	17	1	2	3				0		1	0		0	0	1	1	0	0	0	0	1	0	0			0		2	0	0	0	0	1	0	0	0	0
283	256696	35	2	2	2	1			1	1		2	5	1	2	3				0		1	0		1	1	1	1	0	0	0	0	1	0	0			0		2	0	0	0	0	0	0	0	0	0
284	256698	18	2	2	1	11			1	11		3	16	2	2	3				0		1	1	17	0	0	1	0	0	0	0	0	1	0	0			1	1	2	0	0	0	0	1	0	0	0	0
285	256699	43	2	2	1	3			3	3		2	20	1	2	3				0		1	0		0	0	1	1	0	1	0	0	1	0	0			0		2	0	0	0	0	0	0	0	0	0
286	256700	48	2	2	2	4		30000	2	4		2	48	1	2	3				0		1	0		0	0	0	1	0	0	0	0	1	0	0			0		2	0	0	0	0	0	0	0	0	0
287	256701	58	2	2	4	4		30000	2	4		1	36	1	2	3				0		1	0		0	0	1	1	0	0	0	0	1	0	0			0		2	0	0	0	0	1	0	0	0	0
288	256702	34	2	2	4	4		50000	2	4		2	30	3	2	3				0		1	0		0	0	1	1	0	0	0	0	1	0	0			0		2	1	0	0	0	0	0	0	0	0
289	256703	60	1	2	2	16	DRIVER	350000	3	16	DRIVER	2	3	2	2	3				0		1	0		0	0	1	1	0	0	0	1	1	0	0			0		2	0	0	0	0	0	0	0	0	0
290	256706	35	2	2	2	4			2	4		4	1	1	2	3				1	120	1	0		0	0	0	1	0	0	0	1	1	0	0			0		2	1	0	0	0	1	0	0	0	0
291	256708	45	1	2	2	15			1	15		3	32	1	0	3				0		1	0		0	0	0	0	0	1	0	0	1	0	0			0		2	1	0	0	0	0	0	0	0	0
292	256710	39	2	2	2	2			1	2		3	39	1	2	3				0		0	0		0	0	0	1	0	0	0	0	1	0	0			0		2	0	0	0	0	0	0	0	0	0
293	256711	34	2	2	4	4		50000	2	4		2	30	3	2	3				0		1	0		0	0	1	1	0	0	0	0	1	0	0			0		2	1	0	0	0	0	0	0	0	0
294	256715	42	2	2	2	2			1	2		2	29	3	2	3				0		1	0		0	0	1	1	0	1	0	0	1	0	0			0		2	0	0	0	0	1	0	0	0	0
295	256717	49	2	2	2	4		150000	2	4		2	35	1	2	3				0		1	0		0	1	1	0	0	0	0	0	1	0	0			0		2	0	0	0	0	0	0	0	0	0
296	256718	54	2	2	1	7		150000	1	7		4	13	3	2	3				0		1	0		0	0	0	1	0	0	0	0	1	0	0			0		2	0	0	0	0	0	0	1	0	0
297	256719	38	2	2	2	16	FARMER	1600000	3	16	FARMER	4	23	1	2	3				0		1	0		0	1	1	1	0	1	0	0	1	0	0			0		2	0	0	0	0	0	0	0	0	0
298	256720	35	2	2	2	4		100000	2	4		2	24	3	2	3				0		1	0		1	0	1	1	0	0	0	0	1	0	0			0		2	1	0	1	0	0	0	0	0	0
299	256721	44	2	2	1	16	DRIVER	400000	3	16		3	44	3	2	3				0		1	0		0	0	0	0	0	1	0	0	1	0	0			0		2	0	0	0	0	0	0	0	0	0
300	256723	23	2	2	1	1			1	11		4	19	2	2	3				0		1	1	1	0	0	0	0	0	0	1	1	1	0	0	PERFUMES		0		2	0	0	1	0	0	1	0	0	0
301	256727	61	1	2	3	16	RETIRED		1	16	DRIVER	2	60	1	2	3				0		1	0		1	1	1	1	0	0	0	0	1	0	0			0		2	0	0	0	0	1	0	0	0	0
302	256728	38	2	2	2	11			1	11		4	37	1	2	3				0		1	0		0	0	0	1	0	0	0	0	1	0	0			1	0	2	0	0	0	0	1	0	0	0	0
303	256729	30	2	2	1	4		100000	2	4		3	3	1	2	3				0		1	0		0	0	0	1	0	0	0	0	1	0	0			0		2	0	0	0	0	0	0	1	0	0
304	256730	36	2	2	2	16	DOBBI	50000	3	16	DOBBI	2	31	2	2	3				0		1	0		0	0	0	1	0	1	0	0	1	0	0			0		2	0	0	0	0	0	0	0	0	0
305	256731	53	1	2	2	16	SELF EMPLOYED		2	16	SELF EMPLOYED	4	23	1	2	2	1	31	23	0		1	0		0	1	0	0	0	0	0	1	1	0	0			0		2	1	0	0	0	1	0	0	0	0
306	256733	63	2	2	2	2			1	2		3	37	1	2	3				0		1	0		0	0	1	1	0	1	0	0	1	0	0			0		2	0	0	0	0	0	0	0	0	0
307	256734	61	2	0	4	7		80000	1	7		3	30	1	2	3				0		1	0		1	0	0	1	1	0	0	0	1	0	0			0		2	0	0	0	0	0	0	0	0	0
308	256735	27	2	2	2	1			1	1		3	23	3	2	3				0		1	0		0	0	0	1	0	1	0	0	1	0	0			0		2	0	0	1	0	0	0	0	0	0
309	256736		1	0	1	1			1	11		3	1	1	2	3				0		0	1	1	1	0	1	0	0	0	0	0	1	0	0			0		2	0	0	0	0	1	1	0	0	0
310	256737	18	1	2	1	11			1	11		3	16	1	2	3				0		1	0		1	0	0	1	0	1	0	0	1	0	0			1	0	2	1	0	0	0	1	0	0	0	0
311	256738	63	2	2	4	3			3	3		2	30	1	2	3				0		1	0		0	0	1	1	0	1	0	0	1	0	0			0		2	0	0	0	0	0	0	1	0	0
312	256739	51	2	2	4	1			1	4		3	52	3	2	3				0		1	0		0	0	0	1	0	1	0	0	1	0	0			0		2	0	0	0	0	0	0	0	0	0
313	256740	19	1	2	1	11			1	11		4	6	1	2	3				0		1	0		0	1	1	1	0	1	0	0	1	0	0			1	2	2	0	0	0	0	0	0	0	0	0
314	256741	26	2	2	1	1			1	1		3	26	2	2	3				0		1	0		0	0	0	1	0	0	0	0	1	0	0			0		2	0	0	0	0	1	0	0	0	0
315	256742	26	1	2	2	16	CHEF	300000	2	11		3	25	2	2	3				0		1	0		0	0	0	1	0	0	0	0	1	0	0			0		2	0	0	0	0	0	0	0	0	0
316	256744	32	1	2	2	16	BODA RIDER		3	16	BODA RIDER	2	32	2	2	2	1	3	14	0		1	0		0	0	0	0	0	0	0	1	1	0	0			0		2	1	0	0	0	0	0	0	0	0
317	256745	49	2	2	2	4		100000	2	4		2	32	1	2	3				0		1	0		0	0	0	1	0	0	0	0	1	0	0			0		2	0	0	0	0	1	0	0	0	0
318	256746	46	2	2	2	4		200000	2	4		2	22	1	2	3				0		1	0		1	0	0	1	0	0	0	0	1	0	0			0		2	1	0	0	0	1	0	0	0	0
319	256747	23	2	2	1	15		400000	1	15		4	22	1	2	3				0		1	0		0	1	1	1	0	0	0	0	1	0	0			0		2	0	0	0	0	1	0	0	0	0
320	256748	27	2	2	1	4		80000	2	4		3	4	1	2	3				0		1	0		0	0	0	1	0	0	0	0	1	0	0			0		2	1	0	0	0	0	0	0	0	0
321	256749	27	2	2	2	1			1	1		4	6	1	2	3				0		1	0		0	0	0	1	0	1	0	0	1	0	0			0		2	1	0	1	0	0	0	0	0	0
322	256750	30	1	2	2	9		1200000	2	9		4	30	2	2	3				0		1	0		0	0	0	1	0	0	0	0	1	0	0			0		2	0	0	0	0	0	0	0	0	0
323	256751	21	1	2	1	10		750000	2	10		4	19	1	2	2	0.33	51	5	0		1	0		1	0	1	1	0	1	1	0	1	0	0	SMOKER		0		2	1	0	0	0	1	0	0	0	0
324	256752	34	2	2	2	4		400000	2	4		4	30	1	2	3				0		1	0		0	0	0	1	0	0	0	0	1	0	0			0		2	1	0	0	0	0	0	0	0	0
325	256753	59	2	2	4	3			3	3		2	57	1	2	3				0		1	0		0	0	0	0	0	0	0	0	0	0	0			0		0	0	0	0	0	1	0	0	0	0
326	256754	33	2	2	2	4		100000	2	4		2	25	2	2	3				0		1	0		0	0	1	1	0	0	0	0	1	0	0			0		2	0	0	0	0	0	0	0	0	0
327	256755	24	1	2	1	11			1	11		4	23	1	2	3				0		1	0		0	1	1	1	0	0	0	0	1	0	0			1	0	2	0	0	0	0	1	0	0	0	0
328	256756	24	1	2	1	16	CASUAL WORKER		2	16	CASUAL WORKER	4	1	2	2	3				0		1	0		0	0	0	0	0	0	0	1	1	0	0			0		2	0	0	0	0	1	0	0	0	0
329	256757	28	2	2	2	7		400000	1	7		3	24	1	2	3				0		1	0		0	1	0	1	0	0	0	0	1	0	0			0		2	0	0	0	0	0	0	0	0	0
330	256758	30	2	2	1	13		500000	2	13		4	30	1	2	3				0		1	0		0	0	0	1	0	0	0	0	1	0	0			0		2	1	0	0	0	0	0	0	0	0
331	256759	59	2	2	2	2			1	2		2	45	3	2	3				0		1	0		0	0	1	1	0	0	0	0	1	0	0			0		2	0	0	0	0	0	0	0	0	0
332	256760	38	1	2	2	16	FUMIGATION	100000	3	16	FUMIGATION	2	28	2	2	3				0		1	0		0	0	1	1	0	1	1	0	1	0	0	FUMIGATORS		0		2	1	0	0	0	0	0	0	0	0
333	256761		2	0	2	4		10000	2	4		2	34	2	2	3				0		1	0		0	0	0	1	0	0	0	0	1	0	0			0		2	0	0	0	0	1	0	0	0	0
334	256762	21	2	2	2	16	HOTEL VENDOR		2	2		3		1	2	3				0		1	0		0	0	0	0	0	0	0	1	1	0	0			0		2	1	0	1	0	0	0	0	0	0
335	256763	45	2	2	2	1			1	1		3	6	1	2	3				0		1	0		0	0	0	1	0	0	0	0	1	0	0			0		2	1	0	0	0	0	0	0	0	0
336	256764	45	1	2	2	16	SECURITY	400000	2	16	SECURITY	1	38	3	2	3				0		1	0		0	1	1	1	0	0	0	0	1	0	0			0		2	0	0	0	0	1	0	0	0	0
337	256767	31	2	2	3	1			1	1		3	21	2	2	3				0		1	0		0	0	1	1	0	1	0	0	1	0	0			0		2	1	0	1	0	1	0	0	0	0
338	256768	58	2	2	2	2			1	2		3	57	1	2	3				0		1	0		0	0	0	1	0	1	0	0	1	0	0			0		2	1	0	0	0	0	0	0	0	0
339	256770	26	2	2	2	16	SELLS CLOTHES		2	16	SELLS CLOTHES	3	26	1	2	3				0		1	0		0	0	0	1	0	0	0	1	1	0	0			0		2	1	0	0	0	1	0	0	0	0
340	256771	31	2	2	1	7		150000	1	7		4	20	1	2	3				0		1	0		0	0	0	1	0	0	0	0	1	0	0			0		2	0	0	0	0	0	0	0	0	0
341	256774	38	1	2	2	4			2	4		3	18	1	2	3				0		1	0		1	0	0	1	0	0	0	1	1	0	0			0		2	1	0	0	0	0	0	0	0	0
342	256776	67	1	2	2	15		250000	1	15		4	2	1	2	3				0		1	0		0	0	1	1	0	0	0	1	1	0	0			0		2	1	0	0	0	0	0	0	0	0
343	256777	24	2	2	1	1			1	11		4	14	1	2	3				0		1	1	1	0	0	0	0	0	0	0	0	1	0	0			0		2	1	0	0	0	0	0	0	0	0
344	256779	37	2	2	1	4		900000	2	4		4	35	1	2	3				0		1	0		0	0	0	1	0	0	0	0	1	0	0			0		2	0	0	0	0	0	0	0	0	0
345	256780	19	2	2	1	11			1	11		3	16	1	2	3				0		1	0		1	1	1	1	0	1	0	0	1	0	0			0		2	0	0	0	0	0	0	0	0	0
346	256781	18	2	2	1	11			1	11		3	17	3	2	3				0		1	0		0	1	1	1	0	0	0	0	1	0	0			1	1	2	0	0	0	0	0	0	0	0	0
347	256782	36	2	2	2	7		1500000	1	7		4	26	1	2	3				0		1	0		1	0	1	1	0	1	1	0	0	0	0	PETROL		0		2	1	0	1	0	1	1	0	0	0
348	256783	19	1	2	1	16	POULTRY FARMER	150000	3	16	POULTRY FARMER	2	18	1	2	3				0		1	0		0	0	1	1	0	0	0	0	1	0	0			0		2	0	0	0	0	0	0	0	0	0
349	256784	56	1	2	2	16	DRIVER	100000	3	16	DRIVER	2	54	3	2	3				0		1	0		1	1	1	1	0	0	0	0	1	0	0			0		2	0	0	0	0	0	0	1	0	0
350	256785	44	2	2	2	10		1000000	2	10		4	43	2	2	3				0		0	0		0	1	1	0	0	0	0	1	1	0	0			0		2	0	0	0	0	1	0	0	0	0
351	256786	37	2	2	2	7		300000	1	7		4	18	1	2	3				0		1	0		1	0	0	1	0	0	0	0	1	0	0			0		2	0	0	0	0	1	0	0	0	0
352	256788		2	2	2	2			1	2		4	53	1	2	3				0		1	1	7	0	1	1	1	0	0	0	1	1	0	0			0		2	0	0	0	0	0	0	0	0	0
353	256789	43	2	2	2	7		200000	1	7		4	40	1	2	3				0		1	0		0	0	1	1	0	0	0	0	1	0	0			0		2	0	0	0	0	0	0	0	0	0
354	256792	30	1	2	2	16	DRIVER	250000	3	16	DRIVER	3	28	1	2	3				0		1	0		0	0	0	1	0	0	0	1	1	0	0			0		2	1	0	0	0	0	0	0	0	0
355	256794	23	2	2	2	2			1	2		3	17	3	2	3				0		1	0		0	0	1	1	0	1	0	0	1	0	0			0		2	0	0	0	0	0	0	1	0	0
356	256796	32	1	2	3	16	BODA CYCLIST	50000	3	16	BODA CYCLIST	2	32	2	2	3				0		1	0		0	0	1	1	0	0	0	0	1	0	0			0		2	0	0	0	0	0	0	0	0	0
357	256797	29	2	2	2	4		200000	2	4		3	29	1	2	3				0		1	0		0	0	0	1	0	0	0	0	1	0	0			0		2	0	0	0	0	0	0	0	0	0
358	256800	30	2	2	2	4			2	4		2	20	2	2	3				0		1	1	2	0	0	1	1	0	0	0	1	1	0	0			0		2	1	0	0	0	1	0	0	0	0
359	256801	56	2	2	4	1			1	1		2	38	1	2	3				0		1	0		0	0	0	1	0	0	0	0	1	0	0			0		2	0	0	0	1	0	0	1	0	0
360	256802	33	2	2	2	11			1	11		4	17	1	2	3				0		1	0		0	0	0	0	0	1	0	0	1	0	0			1	0	2	0	0	0	0	0	0	0	0	0
361	256804	25	2	2	1	4		150000	2	4		4	26	1	2	3				0		1	0		0	1	1	1	0	1	0	0	1	0	0			0		2	0	0	0	0	0	0	0	0	0
362	256805	66	1	2	2	3			3	3		2	65	2	2	1	20	5		1	12	1	0		0	0	1	1	0	0	0	0	1	0	0			0		2	1	0	0	0	0	0	0	0	0
363	256806	20	1	2	1	16	2ND HAND CLOTHES		2	16	SALES SECOND HAND CLOTHES	3	1	2	2	3				0		1	0		0	0	0	0	0	0	0	1	1	0	0			0		2	1	0	0	0	0	0	0	0	0
364	256807	38	2	2	2	16	TAILOR	50000	2	16	TAILOR	3	4	1	2	3				0		1	0		0	1	1	1	0	0	0	0	0	0	0			0		2	0	0	0	0	0	0	1	0	0
365	256808	28	2	0	2	16	HAIR DRESSER	600000	2	16	HAIR DRESSER	3	28	2	2	3				0		1	0		0	0	0	1	0	1	0	0	1	0	0			0		2	0	0	0	0	0	0	0	0	0
366	256809	26	1	2	2	16	IT SPECCIALIST	600000	1	16	IT SPECIALIST	4	21	2	2	3				0		1	0		0	0	0	1	0	0	0	1	1	0	0			0		2	0	0	0	0	0	0	0	0	0
367	256811	27	2	2	1	4		100000	2	4		3	27	2	2	3				1	27	1	0		0	0	1	1	0	1	1	0	1	0	0	SMOKE		0		2	0	0	0	0	0	0	0	0	0
368	256813	31	2	2	1	1			1	1		2	30	2	2	3				0		1	0		1	0	1	1	0	0	0	0	1	0	0			0		2	0	0	0	0	1	0	0	0	0
369	256815	43	2	2	2	7		350000	1	7		4	43	1	2	3				0		1	0		1	0	1	1	0	1	0	0	1	0	0			0		2	0	0	0	0	0	0	0	0	0
370	256817	41	2	2	3	4		50000	2	4		2	3	1	2	2	29	20	12	1	24	1	0		0	0	0	1	0	0	0	0	1	0	0			0		2	0	0	0	0	0	0	1	0	0
371	256818		1	2	2	3			3	3		2	70	1	2	3				0		1	0		1	0	1	1	0	0	0	0	1	0	0			0		2	0	0	0	0	0	0	0	0	0
372	256819	22	2	2	1	11			1	11		4	20	1	2	3				0		1	1	4	0	0	1	0	0	0	0	1	1	0	0			1	11	2	1	0	0	0	1	0	0	0	0
373	256820	28	2	2	2	16	HAIR DRESSOR		2	16	HAIR DRESSOR	3	25	3	2	3				0		1	1	3	1	1	1	1	0	0	0	0	1	0	0			0		2	1	0	0	0	0	0	1	0	0
374	256821	25	2	2	2	4		200000	2	4		3	25	1	2	3				0		1	0		0	0	1	1	0	0	0	0	1	0	0			0		2	0	0	0	0	0	0	0	0	0
[truncated: 374 more columns]

## Sheet: Table 2
	Overall (N=374)		Non severe (N=88)		Severe (N=286)		Chi or Mann-W			Overall		Non severe (N=88)		Severe (286)
Characteristic	N	n (%) or median (IQR)	N	n (%) or median (IQR)	N	n (%) or median (IQR)	P			n or median	% or IQR	n or median	% or IQR	n or median	% or IQR
Current age in years, median (IQR)	369	34 (25 - 45)	88	29 (23 - 41)	281	35 (26 - 46)	0.013			34	25 - 45	29	23 - 41	35	26 - 46
Age when first diagnosed with asthma	372	25 (15 - 36)	87	23 (15 - 33)	285	25 (15 - 36)	0.6502			25	15 - 36	23	15 - 33	25	15 - 36
Categories of current age in years, n (%)	367		87		280
18 - 24		86 (23.4)		24 (27.6)		62 (22.1)	0.234			86	23.43	24	27.5862	62	22.14
25 - 34		102 (27.8)		31 (35.6)		71 (25.4)				102	27.79	31	35.6322	71	25.36
35 - 44		82 (22.3)		15 (17.2)		67 (23.9)				82	22.34	15	17.2414	67	23.93
45 - 54		49 (13.4)		8 (9.2)		41 (14.6)				49	13.35	8	9.1954	41	14.64
55 - 64		37 (10.1)		7 (8)		30 (10.7)				37	10.08	7	8.04598	30	10.71
65+		11 (3)		2 (2.3)		9 (3.2)				11	3	2	2.29885	9	3.21
Male Gender, n (%)	374	88 (23.5)	88	20 (22.7)	286	68 (23.8)	0.839
Overall BMI	374	24.8 (21.6 - 29.5)	88	23.7 (20.9 - 28.9)	286	25.7 (21.6 - 29.7)	0.1038			24.8	21.6 - 29.5	23.7	20.9 - 28.9	25.7	21.6 - 29.7
Underweight		22 (5.9)		5 (5.7)		17 (5.9)				22	5.88	5	5.68182	17	5.94406
Normal		168 (44.9)		50 (56.8)		118 (41.3)	0.04			168	44.92	50	56.8182	118	41.2587
Overweight		103 (27.5)		15 (17)		88 (30.8)				103	27.54	15	17.0455	88	30.7692
Obese		81 (21.7)		18 (20.5)		63 (22)				81	21.66	18	20.4545	63	22.028
Marital Status, n (%)	374		88		286
Single		131 (35)		35 (39.8)		96 (33.6)	0.031			131	35.0267	35	39.7727	96	33.5664
Married		188 (50.3)		44 (50)		144 (50.3)				188	50.2674	44	50	144	50.3497
Separated		27 (7.2)		8 (9.1)		19 (6.6)				27	7.21925	8	9.09091	19	6.64336
Widowed		28 (7.5)		1 (1.1)		27 (9.4)				28	7.48663	1	1.13636	27	9.44056
Highest level of education, n (%)	374		88		286
None		14 (3.7)		2 (2.3)		12 (4.2)	0.001			14	3.74332	2	2.27273	12	4.1958
Primary		118 (31.6)		16 (18.2)		102 (35.7)				118	31.5508	16	18.1818	102	35.6643
Secondary		133 (35.6)		46 (52.3)		87 (30.4)				133	35.5615	46	52.2727	87	30.4196
Tertiary		109 (29.1)		24 (27.3)		85 (29.7)				109	29.1444	24	27.2727	85	29.7203
Occupational risk, n (%)	373		88		285
Low		200 (53.6)		45 (51.1)		155 (54.4)	0.347
Moderate		123 (33.0)		34 (38.6)		89 (31.2)
High		50 (13.4)		9 (10.2)		41 (14.4)
Symptoms	374		88		286
Cough		170 (45.5)		31 (35.2)		139 (48.6)	0.028			170	45.4545	31	35.2273	139	48.6014
Duration in days	170	7 (5 - 30 )	31	7 (7 - 30)	139	7 (5 - 30)	0.7158			7	5 - 30	7	7 - 30	7	5 - 30
Wheezing		152 (40.6)		24 (27.3)		128 (44.8)	0.004			152	40.6417	24	27.2727	128	44.7552
Duration in days	152	7 (5 - 25.5)	24	10.5 (7 - 22)	128	7 (4 - 25.5)	0.2671			7	5 - 25.5	10.5	7 - 22	7	4 - 25.5
Chest Pain		119 (31.8)		18 (20.5)		101 (35.3)	0.009			119	31.8182	18	20.4545	101	35.3147
Duration in days	118	7 (7 - 14)	18	10.5 (7 - 16)	100	7 (3 - 14)	0.1572			7	7 - 14	10.5	7 - 16	7	3 - 14
Shortness of breath		105 (28.1)		14 (15.9)		91 (31.8)	0.004			105	28.0749	14	15.9091	91	31.8182
Duration in days	105	7 (3 - 14)	14	14 (7 - 30)	91	7 (3 - 14)	0.0814			7	3 - 14	14	7 - 30	7	3 - 14
Blocked Nose		32 (8.6)		6 (6.8)		26 (9.1)	0.505			32	8.55615	6	6.81818	26	9.09091
Duration in days	32	8.5 (5 - 30)	6	10.5 (5 - 30)	26	8.5 (5 - 30)	0.9419			8.5	5 - 30	10.5	5 - 30	8.5	5 - 30
Running nose		22 (5.9)		8 (9.1)		14 (4.9)	0.144			22	5.88235	8	9.09091	14	4.8951
Duration in days	22	12 (7 - 30)	8	7 (7 - 30)	14	14 (7 - 30)	0.4216			12	7 - 30	7	7 - 30	14	7 - 30
Sputum production		22 (5.9)		3 (3.4)		19 (6.6)	0.312			22	5.88235	3	3.40909	19	6.64336
Duration in days	21	7 (41760)	3	7 (11140)	18	7 (41760)	0.6271			7	5 - 14	7	7 - 30	7	5 - 14
Sore throat		4 (1.1)		0 (0)		4 (1.4)	0.577			4	1.06952	0	0	4	1.3986
Duration in days	4	5 (2.5 - 18.5)	0		4	5 (2.5 - 18.5)	NA			5	2.5 - 18.5			5	2.5 - 18.5
Level of asthma control	372
Well controlled		94 (25.3)	88	46 (52.3)	284	48 (16.8)	0			94	25.27	46	52.2727	48	16.7832
Not well controlled		278 (74.7)		42 (47.7)		236 (82.5)				278	74.73	42	47.7273	236	82.5175
Do you have contact with any of the following?	374		88		286
Dust		366 (97.9)		87 (98.9)		279 (97.6)	0.687			366	97.861	87	98.8636	279	97.5524
Cockroaches		275 (73.5)		67 (76.1)		208 (72.7)	0.526			275	73.5294	67	76.1364	208	72.7273
Chicken or other birds		170 (45.5)		39 (44.3)		131 (45.8)	0.807			170	45.4545	39	44.3182	131	45.8042
Car fumes on regular basis		115 (30.7)		25 (28.4)		90 (31.5)	0.587			115	30.7487	25	28.4091	90	31.4685
Pollen		102 (27.3)		21 (23.9)		81 (28.3)	0.412			102	27.2727	21	23.8636	81	28.3217
Cats		83 (22.2)		20 (22.7)		63 (22)	0.89			83	22.1925	20	22.7273	63	22.028
Dogs		71 (19)		13 (14.8)		58 (20.3)	0.249			71	18.984	13	14.7727	58	20.2797
Chemicals		28 (7.5)		7 (8)		21 (7.3)	0.849			28	7.48663	7	7.95455	21	7.34266
Molds		7 (1.9)		1 (1.1)		6 (2.1)	1			7	1.87166	1	1.13636	6	2.0979
Other		2 (0.5)		0 (0)		2 (0.7)	NA			2	0.534759	0	0	2	0.699301
Currently suffering or diagnosed from the following diseases	374		88		286
Rhino sinusitis		115 (30.7)		33 (37.5)		82 (28.7)	0.117			115	30.7487	33	37.5	82	28.6713
Gastroesophageal reflux disease		90 (24.1)		15 (17)		75 (26.2)	0.078			90	24.0642	15	17.0455	75	26.2238
Hypertension		42 (11.2)		7 (8)		35 (12.2)	0.266			42	11.2299	7	7.95455	35	12.2378
HIV		28 (7.5)		3 (3.4)		25 (8.7)	0.109			28	7.48663	3	3.40909	25	8.74126
Eczema/dermatitis		23 (6.1)		3 (3.4)		20 (7)	0.311			23	6.14973	3	3.40909	20	6.99301
Obstructive sleep apnea		10 (2.7)		1 (1.1)		9 (3.1)	0.463			10	2.6738	1	1.13636	9	3.14685
Depression or other psychiatry illness		3 (0.8)		0 (0)		3 (1)	1			3	0.802139	0	0	3	1.04895
Heart failure		1 (0.3)		0 (0)		1 (0.3)	1			1	0.26738	0	0	1	0.34965
Nasal polyps		0 (0)		0 (0)		0 (0)	NA			0	0	0	0	0	0
COPD		0 (0)		0 (0)		0 (0)	NA			0	0	0	0	0	0
None of the above		171 (45.7)		42 (47.7)		147 (51.4)	0.385			171	45.7219	42	47.7273	147	51.3986
SPIROMETRY
Pre-measurements, Median (IQR)			88		286
FVC	374	2.9 (2.2 - 3.4)		3.3 (2.9 - 3.6)		2.7 (2.1 - 3.2)	0			2.9	2.2 - 3.4	3.3	2.9 - 3.6	2.7	2.1 - 3.2
FVC%	374	100 (83 - 112)		110 (103 - 120)		95.5 (78 - 109)	0			100	83 - 112	110	103 - 120	95.5	78 - 109
FEV1	374	2.1 (1.6 - 2.7)		2.6 (2.3 - 3.0)		1.97 (1.4 - 2.5)	0			2.1	1.6 - 2.7	2.6	2.3 - 3.0	1.97	1.4 - 2.5
FEV1%	374	88 (65 - 105)		103 (91.5 - 115.5)		79 (60 - 100)	0			88	65 - 105	103	91.5 - 115.5	79	60 - 100
FEV1/FVC ratio	374	0.76 (0.66 - 0.84)		0.82 (0.74 - 0.88)		0.73 (0.63 - 0.83)	0			0.76	0.66 - 0.84	0.82	0.74 - 0.88	0.73	0.63 - 0.83
Lung funtion	374
Normal		201 (53.7)		76 (86.4)		125 (43.7)	0			201	53.74	76	86.3636	125	43.7063
Poor		173 (46.3)		12 (13.6)		161 (56.3)				173	46.26	12	13.6364	161	56.2937
Post-measurement, Median (IQR)			9		117
FVC	126	2.6 (2.2 - 3.4)		3.1 (2.8 - 3.6)		2.62 (2.2 - 3.4)	0.0504			2.6	2.2 - 3.4	3.1	2.8 - 3.6	2.62	2.2 - 3.4
FVC %	126	99.5 (80 - 112)		117 (111 - 120)		97 (80 - 111)	0.0019			99.5	80 - 112	117	111 - 120	97	80 - 111
FEV1	126	1.8 (1.3 - 2.3)		2.3 (2.1 - 2.5)		1.73 (1.29 - 2.2)	0.0101			1.8	1.3 - 2.3	2.3	2.1 - 2.5	1.73	1.29 - 2.2
FEV1%	126	73.5 (56 - 89)		98 (92 - 103)		71 (56 - 87)	0.0001			73.5	56 - 89	98	92 - 103	71	56 - 87
FEV1/FVC ratio	126	0.65 (0.56 - 0.71)		0.74 (0.7 - 0.76)		0.64 (0.56 - 0.71)	0.0063			0.65	0.56 - 0.71	0.74	0.7 - 0.76	0.64	0.56 - 0.71
Methacholine challenge test, MCT, n (%)	361		85		277
Positive		23 (6.4)		2 (2.4)		21 (7.6)	0.19			23	6.35359	2	2.35294	21	7.58123
Negative		338 (93.4)		83 (97.6)		255 (92.1)				338	93.3702	83	97.6471	255	92.0578
Skin prick, at least one allergen positive, n (%)	331		71		260	(0)
Yes		310 (93.7)		67 (94.4)		243 (93.5)	1			310	93.7	67	94.3662	243	93.4615
No		21 (6.3)		4 (5.6)		17 (6.5)				21	6.3	4	5.6338	17	6.53846
Eosinophilic count, n (%)	374
AEC<500		310 (82.9)		72 (81.8)		238 (83.2)	0.761			310	82.8877	72	81.8182	238	83.2168
AEC>=500		64 (17.1)		16 (18.2)		48 (16.8)				64	17.1123	16	18.1818	48	16.7832
Eosino, Median (IQR)	374	210 (110 - 390)		200 (110 - 410)		215 (100 - 390)	0.9843			210	110 - 390	200	110 - 410	215	100 - 390
Total BHQ score, Median (IQR)	374	72 (49 - 98)	88	61.5 (32.5 - 78.5)	286	77.5 (53 - 102)	0.0001			72	49 - 98	61.5	32.5 - 78.5	77.5	53 - 102
Patient uses ICS	370	34 (9.2)	87	3 (3.4)	283	31 (11)	0.034			34	9.19	3	3.44828	31	10.9541
History of smoking, n (%)	374		88		286					374
Current smoker		1 (0.3)		0 (0)		1 (0.3)	0.569			1	0.26738	0	0	1	0.34965
Former smoker		22 (5.9)		7 (8)		15 (5.2)				22	5.88235	7	7.95455	15	5.24476
Never		351 (93.9)		81 (92)		270 (94.4)				351	93.8503	81	92.0455	270	94.4056
Secondary smoker, n(%)	374	20 (5.3)	88	4 (4.5)	286	16 (5.6)	1			374
Relatives who have asthma, n (%)	372		87		285					372
Yes		222 (59.7)		50 (57.5)		172 (60.4)	0.149			222	59.6774	50	57.4713	172	60.3509
No		89 (23.9)		27 (31)		62 (21.8)				89	23.9247	27	31.0345	62	21.7544
Don’t know		61 (16.4)		10 (11.5)		51 (17.9)				61	16.3978	10	11.4943	51	17.8947
Exposed to smoke from firewood, charcoal.	374	344 (92)	88	76 (86.4)	286	268 (93.7)	0.027			374
Use of kerosene for lighting or cooking, n (%)	374	374 (100)	88	12 (13.6)	286	37 (12.9)	0.865			374	100
Depression status according to total PHQ-9 score	374		88		286					374
No depression		15 (4)		9 (10.2)		6 (2.1)	0			15	4.0107	9	10.2273	6	2.0979
Minimal depression		96 (25.7)		27 (30.7)		69 (24.1)				96	25.6684	27	30.6818	69	24.1259
Mild depression		113 (30.2)		32 (36.4)		81 (28.3)				113	30.2139	32	36.3636	81	28.3217
Moderate depression		92 (24.6)		11 (12.5)		81 (28.3)				92	24.5989	11	12.5	81	28.3217
Moderately severe depression		47 (12.6)		9 (10.2)		38 (13.3)				47	12.5668	9	10.2273	38	13.2867
Severe depression		11 (2.9)		0 (0)		11 (3.8)				11	2.94118	0	0	11	3.84615
Patient uses inhaler medication:	370	108 (29.2)	87	13 (14.9)	283	95 (33.6)	0.001			370
What makes asthma worse	374		88		286
Upper respiratory infection		371 (99.2)		87 (98.9)		284 (99.3)	0.514			371	99.1979	87	98.8636	284	99.3007
Exposure to household pets such as cats, dogs or poultry		13 (3.5)		4 (4.5)		9 (3.1)	0.514			13	3.47594	4	4.54545	9	3.14685
Smoking or exposure to tobacco smoke		356 (95.2)		81 (92)		275 (96.2)	0.115			356	95.1872	81	92.0455	275	96.1538
Strong emotions such as anger, excitement, anxiety		223 (59.6)		45 (51.1)		178 (62.2)	0.063			223	59.6257	45	51.1364	178	62.2378
Cold weather		341 (91.2)		82 (93.2)		259 (90.6)	0.448			341	91.1765	82	93.1818	259	90.5594
Drugs such those treating high blood pressure and pain killers like aspirin		1 (0.3)				1 (0.3)	1			1	0.26738	0	0	1	0.34965
Exercise		116 (31)		21 (23.9)		95 (33.2)	0.097			116	31.016	21	23.8636	95	33.2168
Dust		359 (96)		83 (94.3)		276 (96.5)	0.361			359	95.9893	83	94.3182	276	96.5035
Strong smells or perfumes		315 (84.2)		74 (84.1)		241 (84.3)	0.969			315	84.2246	74	84.0909	241	84.2657
Exposure at work		13 (3.5)		2 (2.3)		11 (3.8)	0.741			13	3.47594	2	2.27273	11	3.84615
Other		5 (1.3)		2 (2.3)		3 (1)	0.336			5	1.3369	2	2.27273	3	1.04895
None of the above		0 (0)		0 (0)		0 (0)	NA			0	0	0	0	0	0
Currently or recently used the following medication	374		88		286					374		88		286
Aspirin		6 (1.6)		1 (1.1)		5 (1.7)	1			6	1.60428	1	1.13636	5	1.74825
NSAIDs		0 (0)		0 (0)		0 (0)	NA			0	0	0	0	0	0
ACE inhibitors		5 (1.3)		2 (2.3)		3 (1)	0.336			5	1.3369	2	2.27273	3	1.04895
Beta blockers		3 (0.8)		1 (1.1)		2 (0.7)	0.554			3	0.802139	1	1.13636	2	0.699301
Estrogens		4 (1.1)		2 (2.3)		2 (0.7)	0.237			4	1.06952	2	2.27273	2	0.699301
Herbs		22 (5.9)		7 (8)		15 (5.2)	0.345			22	5.88235	7	7.95455	15	5.24476
Supplements		2 (0.5)		1 (1.1)		1 (0.3)	0.416			2	0.534759	1	1.13636	1	0.34965
Others		72 (19.3)		11 (12.5)		61 (21.3)	0.066			72	19.2513	11	12.5	61	21.3287
None of the above		274 (73.3)		1 (1.1)		207 (72.4)	0.486			274	73.262	1	1.13636	207	72.3776

## Sheet: Table 3
		Overall		Non severe		Severe				Overall		Non severe (N=88)		Severe (286)
Characteristic	N	n (%) or median (IQR)	N	n (%) or median (IQR)	N	n (%) or median (IQR)	P			n or median	% or IQR	n or median	% or IQR	n or median	% or IQR
Asp IgG	356	9.46 (5.4 - 17.3)	86	10.35 (6.38 - 18)	270	9.14 (5.19 - 17.2)	0.104			9.455	5.4 - 17.3	10.35	6.38 - 18	9.14	5.19 - 17.2
Elevated Asp IgG (>40)	374	16 (4.3)	88	6 (6.8)		10 (3.5)	0.178
Asp IgE	374	0.03 (0.01 - 0.08)	88	0.03 (0.01 - 0.09)	286	0.03 (0.01 - 0.08)	0.911			0.03	0.01 - 0.08	0.03	0.01 - 0.09	0.03	0.01 - 0.08
Elevated Asp IgE (>0.35)	374	27 (7.2)	88	8 (9.1)		19 (6.6)	0.438
Total IgE	374	385.22 (107.46 - 1013.29)	88	283.08 (91.46 - 899.03)	286	388.14 (107.92 - 1021.7)	0.513			385.215	107.46 - 1013.29	283.08	91.46 - 899.03	388.14	107.92 - 1021.7
Elevated total IgE (>113.9)	374	275 (73.5)	88	63 (71.6)	286	212 (74.1)	0.637
Total IgE >1000	374	95 (25.4)	88	21 (23.9)	286	74 (25.9)	0.705
Pos AspSPT	374	143 (38.2)	88	33 (37.5)	286	110 (38.5)	0.871
Positive AspSPT and AspIgE	374	13 (3.5)	88	3 (3.41)	286	10 (3.5)	1
									Biomarkers	Overall	Non severe	Severe
										n (%)	n (%)	n (%)	P
									AspSPT
									Negative	231 (61.8)	55 (62.5)	176 (61.5)	0.871
									Positive	143 (38.2)	33 (37.5)	110 (38.5)
									AspIgE
									Negative	347 (92.8)	80 (90.9)	267 (93.4)	0.438
									Positive	27 (7.2)	8 (9.1)	19 (6.6)
									Positive AspSPT and AspIgE
									Yes	13 (3.5)	3 (3.41)	10 (3.5)	1
									No	361 (95.5)	85 (96.6)	276 (96.5)

## Sheet: Table 4
		Asp IgE		Asp IgG
Characteristic	N	Median (IQR)	P	Median (IQR)	P
Categories of current age in years, n (%)
18 - 24	86	0.03 (0.01 - 0.09)	0.797	8.41 (4.88 - 14.10)	0.013
25 - 34	102	0.03 (0.02 - 0.08)		12.10 (5.4 - 19.2)
35 - 44	82	0.02 (0.01 - 0.07)		8.40 (5.31 - 16.10)
45 - 54	49	0.02 (0.01 - 0.08)		8.69 (4.99 - 16.60)
55 - 64	37	0.02 (0.01 - 0.14)		7.27 (3.24 - 13.4)
65+	11	0.02 (0.01 - 0.07)		4.49 (3.78 - 6.97)
Gender, n (%)
Male	88	0.05 (0.03 - 0.13)	0	8.12 (5.19 - 13.15)	0.1926
Female	286	0.02 (0.01 - 0.07)		9.09 (5.03 - 17.80)
BMI
Underweight	22	0.04 (0.01 - 0.14)	0.0726	6.00 (4.3 - 12.6)	0.2178
Normal	168	0.04 (0.01 - 0.09)		8.3 (4.92 - 15.25)
Overweight	103	0.02 (0.01 - 0.07)		10.7 (5.18 - 17.8)
Obese	81	0.02 (0.01 - 0.06)		11.0 (5.35 - 18)
Occupational risk
Low	200	0.03 (0.01 - 0.08)	0.3018	8.4 (5.0 - 15.7)	0.1752
Moderate	123	0.03 (0.01 - 0.08)		10.4 (5.4 - 20.9)
High	50	0.04 (0.02 - 0.09)		7.6 (4.8 - 14.0)
Symptoms
Cough
Yes	170	0.03 (0.01 - 0.08)	0.7784	8.03 (4.8 - 16.1)	0.1763
No	204	0.03 (0.01 - 0.09)		9.36 (5.34 - 16.90)
Sputum production
Yes	22	0.02 (0.01 - 0.06)	0.163	7.79 (4.2 - 25.0)	0.8748
No	352	0.03 (0.01 - 0.09)		8.81 (5.155 - 16.25)
Wheezing
Yes	152	0.03 (0.01 - 0.08)	0.9101	7.87 (4.8 - 16.1)	0.1609
No	222	0.03 (0.01 - 0.09)		9.36 (5.18 - 10.9)
Shortness of breath
Yes	105	0.02 (0.01 - 0.07)	0.0785	7.63 (4.8 - 14.6)	0.1424
No	269	0.03 (0.01 - 0.09)		9.66 (5.17 - 16.9)
Chest Pain
Yes	119	0.02 (0.01 - 0.07)	0.05	7.97 (4.39 - 17.8)	0.3934
No	255	0.03 (0.01 - 0.09)		9.12 (5.17 - 16.3)
Palpitations
Yes	8	0.01 (0.01 - 0.03)	0.0739	11.09 (5.3 - 21.2)	0.6661
No	366	0.03 (0.01 - 0.08)		8.72 (5.05 - 16.5)
Body swelling
Yes	2	0.01 (0.00 - 0.02)	0.1465	17.55 (14.1 - 21)	0.2115
No	372	0.03 (0.01 - 0.08)		8.70 (5.05 - 16.5)
Reduced urine output
Yes	1	0.01	0.2564	1 (14.0)	0.5318
No	373	0.03 (0.01 - 0.08)		8.7 (5.05 - 16.5)
Running nose
Yes	22	0.03 (0.01 - 0.05)	0.2393	9.80 (5.17 - 14.4)	0.7676
No	352	0.03 (0.01 - 0.09)		8.63 (5.05 - 16.7)
Level of asthma control
Well controlled	94	0.02 (0.01 - 0.07)	0.0387	11.15 (5.71 - 20.70)	0.0319
Not well controlled	278	0.03 (0.01 - 0.09)		8.40 (4.92 - 15.40)
Do you have contact with any of the following? (N=374)
Molds
Yes	7	0.02 (0.01 - 0.05)	0.6474	12.00 (3.24 - 35.60)	0.3969
No	367	0.03 (0.01 - 0.08)		8.69 (5.05 - 16.50)
Currently suffering or diagnosed from the following diseases
Rhino sinusitis
Yes	115	0.04 (0.01 - 0.10)	0.1478	8.87 (5.35 - 14.50)	0.8224
No	259	0.03 (0.01 - 0.08)		8.55 (4.88 - 17.30)
HIV
Yes	28	0.04 (0.02 - 0.09)	0.5699	4.72 (3.25 - 7.99)	0.0003
No	346	0.03 (0.01 - 0.08)		9.36 (5.31 - 17.20)
Eczema/dermatitis
Yes	23	0.05 (0.02 - 0.11)	0.1798	7.90 (3.79 - 14.00)	0.2927
No	351	0.03 (0.01 - 0.08)		8.75 (5.08 - 16.90)
Depression or other psychiatry illness
Yes	3	0.03 (0.00 - 0.04)	0.4571	26.00 (1.00 - 84.10)	0.44
No	371	0.03 (0.01 - 0.08)		8.70 (5.05 - 16.50)
Lung funtion
Normal	201	0.02 (0.01 - 0.07)	0.0005	9.27 (5.25 - 17.2)	0.2728
Poor	173	0.04 (0.02 - 0.09)		8.24 (4.92 - 16.30)
Methacholine challenge test, MCT, n (%)
Positive	23	0.03 (0.02 - 0.09)	0.3594	10.30 (6.49 - 15.20)	0.5328
Negative	338	0.03 (0.01 - 0.08)		8.64 (4.99 - 16.90)
Skin prick, at least one allergen positive, n (%)
Yes	310	0.03 (0.01 - 0.09)	0.6526	8.45 (5.03 - 16.20)	0.3126
No	21	0.02 (0.01 - 0.07)		13.00 (4.49 - 22.30)
Eosinophilic count, n (%)
AEC<500	310	0.02 (0.01 - 0.08)	0.0036	8.56 (4.97 - 16.90)	0.9954
AEC>=500	64	0.05 (0.02 - 0.12)		10.25 (5.28 - 15.45)
Patient uses ICS:
Yes	34	0.02 (0.01 - 0.05)	0.103	6.38 (4.62 - 10.80)	0.036
No	336	0.03 (0.01 - 0.09)		9.36 (5.11 - 17.25)
Patient uses inhaler medication:	370
Yes	108	0.04 (0.01 - 0.09)	0.6238	7.02 (4.88 - 14.9)	0.0754
No	262	0.03 (0.01 - 0.08)		9.69 (5.18 - 17.3)
What makes asthma worse
Upper respiratory infection	371	0.03 (0.01 - 0.08)	0.3016	8.7 (5.05 - 16.5)	0.3096
Dust	359	0.03 (0.01 - 0.08)	0.7298	8.7 (5.08 - 16.5)	0.7792
Currently or recently used the following medication	374
Herbs	22	0.04 (0.01 - 0.11)	0.722	13.45 (6.56 - 20.4)	0.0619

## Sheet: Table 5
Variables	AS				ABPA				SAFS				ABPM									AS		ABPA		SAFS		ABPM
	N	n (%)	COR (95% CI)	P	N	n (%)	COR (95% CI)	P	N	n (%)	COR (95% CI)	P	N	n (%)	COR (95% CI)	P						n (%)	%	n (%)	%	n (%)	%	n (%)	%
Overall prevalence	374	157 (58.0)			374	12 (3.2)			374	60 (16.0)			374	11 (2.9)								157 (58.0)		12 (3.2)		60 (16.0)		11 (2.9)
Characteristic
Categories of current age in years, n (%)	155				11				59				11
18 - 24		31 (20)	1			3 (27.3)	1			9 (15.3)	1			1 (9.1)	1							31	20	3	27.2727	9	15.2542	1	9.09091
25 - 34		40 (25.8)	1.14 (0.63 - 2.07)	0.655		4 (36.4)	1.13 (0.25 - 5.19)	0.876		18 (30.5)	1.83 (0.78 - 4.32)	0.166		2 (18.2)	1.7 (0.15 - 19.08)	0.667						40	25.8065	4	36.3636	18	30.5085	2	18.1818
35 - 44		34 (21.9)	1.26 (0.67 - 2.34)	0.471		2 (18.2)	0.69 (0.11 - 4.25)	0.691		14 (23.7)	1.76 (0.72 - 4.33)	0.217		4 (36.4)	4.36 (0.48 - 39.84)	0.192						34	21.9355	2	18.1818	14	23.7288	4	36.3636
45 - 54		23 (14.8)	1.57 (0.77 - 3.20)	0.215		0 (0)	NA			7 (11.9)	1.43 (0.5 - 4.1)	0.511		2 (18.2)	3.62 (0.32 - 40.95)	0.299						23	14.8387	0	0	7	11.8644	2	18.1818
55 - 64		22 (14.2)	2.60 (1.18 - 5.73)	0.018		2 (18.2)	1.58 (0.25 - 9.88)	0.624		9 (15.3)	2.75 (0.99 - 7.63)	0.052		2 (18.2)	4.86 (0.43 - 55.31)	0.203						22	14.1935	2	18.1818	9	15.2542	2	18.1818
65+		5 (3.2)	1.48 (0.42 - 5.24)	0.545		0 (0)	NA			2 (3.4)	1.9 (0.35 - 10.21)	0.454		0 (0)	NA							5	3.22581	0	0	2	3.38983	0	0
Gender, n (%)	157				12				60				11																0
Male		40 (25.5)	1			5 (41.7)	1			14 (23.3)	1			3 (27.3)	1							40	25.4777	5	41.6667	14	23.3333	3	27.2727
Female		117 (74.5)	0.83 (0.51 - 1.34)	0.45		7 (58.3)	0.42 (0.13 - 1.35)	0.143		46 (76.7)	1.01 (0.53 - 1.95)	0.969		8 (72.7)	0.82 (0.21 - 3.14)	0.767						117	74.5223	7	58.3333	46	76.6667	8	72.7273
BMI	157				12				60				11																0
Underweight		7 (4.5)	0.69 (0.27 - 1.77)	0.437		0 (0)	NA			4 (6.7)	1.56 (0.48 - 5.04)	0.461		0 (0)	NA							7	4.4586	0	0	4	6.66667	0	0
Normal		68 (43.3)	1			5 (41.7)	1			21 (35)	1			5 (45.5)	1							68	43.3121	5	41.6667	21	35	5	45.4545
Overweight		42 (26.8)	1.01 (0.61 - 1.67)	0.961		6 (50)	2.02 (0.60 - 6.78)	0.257		19 (31.7)	1.58 (0.81 - 3.11)	0.183		4 (36.4)	1.32 (0.35 - 5.02)	0.687						42	26.7516	6	50	19	31.6667	4	36.3636
Obese		40 (25.5)	1.43 (0.84 - 2.45)	0.185		1 (8.3)	0.41 (0.05 - 3.55)	0.416		16 (26.7)	1.72 (0.84 - 3.51)	0.135		2 (18.2)	0.83 (0.16 - 4.35)	0.821						40	25.4777	1	8.33333	16	26.6667	2	18.1818
Marital Status, n (%)	157				12				60				11																0
Single		48 (30.6)	1			4 (33.3)	1			15 (25)	1			2 (18.2)	1							48	30.5732	4	33.3333	15	25	2	18.1818
Married		80 (51)	1.28 (0.81 - 2.03)	0.29		6 (50)	1.05 (0.29 - 3.78)	0.945		31 (51.7)	1.53 (0.79 - 2.96)	0.21		6 (54.5)	2.13 (0.42 - 10.7)	0.36						80	50.9554	6	50	31	51.6667	6	54.5455
Separated		12 (7.6)	1.38 (0.60 - 3.20)	0.448		0 (0)	NA			7 (11.7)	2.71 (0.98 - 7.47)	0.054		1 (9.1)	2.48 (0.22 - 28.38)	0.465						12	7.64331	0	0	7	11.6667	1	9.09091
Widowed		17 (10.8)	2.67 (1.16 - 6.18)	0.021		2 (16.7)	2.44 (0.425 - 14.04)	0.317		7 (11.7)	2.58 (0.94 - 7.08)	0.066		2 (18.2)	4.96 (0.67 - 36.84)	0.117						17	10.828	2	16.6667	7	11.6667	2	18.1818
Highest level of education, n (%)	157				12				60				11																0
None		10 (6.4)	1			0 (0)	NA			2 (3.3)	1			0 (0)	NA							10	6.36943	0	0	2	3.33333	0	0
Primary		52 (33.1)	0.32 (0.09 - 1.06)	0.063		5 (41.7)	2.37 (0.45 - 12.46)	0.309		27 (45)	1.78 (0.38 - 8.45)	0.468		6 (54.5)	2.87 (0.57 - 14.51)	0.203						52	33.121	5	41.6667	27	45	6	54.5455
Secondary		49 (31.2)	0.23 (0.07 - 0.78)	0.019		5 (41.7)	2.09 (0.40 - 10.99)	0.384		14 (23.3)	0.71 (0.14 - 3.48)	0.669		3 (27.3)	1.23 (0.2 - 7.52)	0.819						49	31.2102	5	41.6667	14	23.3333	3	27.2727
Tertiary		46 (29.3)	0.29 (0.09 - 0.99)	0.048		2 (16.7)	NA			17 (28.3)	1.11 (0.23 - 5.4)	0.898		2 (18.2)	1							46	29.2994	2	16.6667	17	28.3333	2	18.1818
Occupational risk, n (%)									60				11																0
Low	157	84 (53.5)	1		12	4 (33.3)	1			35 (58.3)	1			6 (54.6)	1														0
Moderate		51 (32.5)	0.98 (0.62 - 1.54)	0.924		4 (33.3)	1.65 (0.40 - 6.71)	0.486		15 (25.0)	0.65 (0.34 - 1.26)	0.203		3 (27.3)	0.81 (0.20 - 3.29)	0.767													0
High		22 (14.0)	1.09 (0.58 - 2.03)	0.798		4 (33.3)	4.26 (1.03 - 17.67)	0.046		10 (16.7)	1.18 (0.54 - 2.58)	0.681		2 (18.2)	1.35 (0.26 - 6.88)	0.72													0
Symptoms	157				12				60				11																0
Cough		64 (40.8)	0.72 (0.48 - 1.09)	0.122		5 (41.7)	0.85 (0.27 - 2.74)	0.789		28 (46.7)	1.06 (0.61 - 1.84)	0.837		6 (54.5)	1.46 (0.44 - 4.86)	0.541						64	40.7643	5	41.6667	28	46.6667	6	54.5455
Sputum production		9 (5.7)	0.95 (0.40 - 2.29)	0.917		0 (0)	NA			4 (6.7)	1.17 (0.38 - 3.6)	0.778		0 (0)	NA							9	5.73248	0	0	4	6.66667	0	0
Wheezing		65 (41.4)	1.06 (0.70 - 1.60)	0.799		2 (16.7)	0.5 (0.11 - 2.33)	0.38		28 (46.7)	1.34 (0.77 - 2.34)	0.301		6 (54.5)	1.78 (0.53 - 5.95)	0.347						65	41.4013	2	16.6667	28	46.6667	6	54.5455
Shortness of breath		47 (29.9)	1.17 (0.74 - 1.85)	0.496		2 (16.7)	0.5 (0.11 - 2.33)	0.38		19 (31.7)	1.23 (0.68 - 2.23)	0.5		3 (27.3)	0.96 (0.25 - 3.69)	0.952						47	29.9363	2	16.6667	19	31.6667	3	27.2727
Chest Pain		45 (28.7)	0.78 (0.50 - 1.21)	0.266		2 (16.7)	0.42 (0.09 - 1.94)	0.266		19 (31.7)	0.99 (0.55 - 1.8)	0.978		3 (27.3)	0.8 (0.21 - 3.07)	0.743						45	28.6624	2	16.6667	19	31.6667	3	27.2727
Palpitations		5 (3.2)	2.35 (0.55 - 9.97)	0.248		0 (0)	NA			4 (6.7)	5.54 (1.35 - 22.78)	0.018		0 (0)	NA							5	3.18471	0	0	4	6.66667	0	0
Body swelling		1 (0.6)	1.38 (0.09 - 22.31)	0.818		0 (0)	NA			1 (1.7)	5.31 (0.33 - 86)	0.24		0 (0)	NA							1	0.636943	0	0	1	1.66667	0	0
Reduced urine output		1 (0.6)	NA			0 (0)	NA			1 (1.7)	NA			0 (0)	NA							1	0.636943	0	0	1	1.66667	0	0
Running nose		8 (5.1)	0.78 (0.32 - 1.90)	0.583		1 (8.3)	1.48 (0.18 - 11.98)	0.715		3 (5)	0.82 (0.23 - 2.85)	0.752		1 (9.1)	1.63 (0.2 - 13.33)	0.649						8	5.09554	1	8.33333	3	5	1	9.09091
Vomiting		0 (0)	NA			0 (0)	NA			0 (0)	NA			0 (0)	NA							0	0	0	0	0	0	0	0
Abdominal pain		1 (0.6)	0.23 (0.03 - 1.89)	0.17		0 (0)	NA			0 (0)	NA			0 (0)	NA							1	0.636943	0	0	0	0	0	0
Yellow body/ eyes		0 (0)	NA			0 (0)	NA			0 (0)	NA			0 (0)	NA							0	0	0	0	0	0	0	0
Seizures		1 (0.6)	NA			0 (0)	NA			1 (1.7)	NA			0 (0)	NA							1	0.636943	0	0	1	1.66667	0	0
Limb weakness		1 (0.6)	0.69 (0.06 - 7.67)	0.762		0 (0)	NA			1 (1.7)	2.64 (0.24 - 29.63)	0.43		0 (0)	NA							1	0.636943	0	0	1	1.66667	0	0
Headaches		4 (2.5)	0.68 (0.20 - 2.31)	0.54		0 (0)	NA			3 (5)	1.78 (0.47 - 6.79)	0.396		0 (0)	NA							4	2.54777	0	0	3	5	0	0
Memory problems		0 (0)	NA			0 (0)	NA			0 (0)	NA			0 (0)	NA							0	0	0	0	0	0	0	0
Skin rashes		0 (0)	NA			0 (0)	NA			0 (0)	NA			0 (0)	NA							0	0	0	0	0	0	0	0
Sore throat		3 (1.9)	4.21 (0.43 - 40.83)	0.215		0 (0)	NA			2 (3.3)	5.38 (0.74 - 38.96)	0.096		0 (0)	NA							3	1.91083	0	0	2	3.33333	0	0
Joint swellings		2 (1.3)	1.38 (0.09 - 22.31)	0.818		0 (0)	NA			1 (1.7)	5.31 (0.33 - 86)	0.24		0 (0)	NA							2	1.27389	0	0	1	1.66667	0	0
Blocked Nose		2 (1.3)	0.60 (0.28 - 1.31)	0.202		2 (16.7)	2.21333	1.7656	1	2 (3.3)	0.33 (0.08 - 1.4)	0.133		1 (9.1)	1.07 (0.13 - 8.64)	0.949						2	1.27389	2	16.6667	2	3.33333	1	9.09091
Facial pain		0 (0)	NA			0 (0)	NA			0 (0)	NA			0 (0)	0 (0 - 0)	NA						0	0	0	0	0	0	0	0
Level of asthma control	157				12				60				10												0
Well controlled		38 (24.2)	1			3 (25)	1			6 (10)	1			3 (30)	1							38	24.2038	3	25	6	10	3	30
Not well controlled		119 (75.8)	1.10 (0.69 - 1.77)	0.686		9 (75)	1.01 (0.27 - 3.83)	0.983		54 (90)	3.54 (1.47 - 8.51)	0.005		7 (70)	0.78 (0.2 - 3.09)	0.728						119	75.7962	9	75	54	90	7	70
Asthma severity	157				12				60				11												0
Severe		167 (0)	0.94 (0.58 - 1.52)	0.794		11 (91.7)	3.48 (0.44 - 27.34)	0.236		60 (100)	NA			11 (0)	NA							167		11	91.6667	60	100	11
Non-severe		50 (0)	1			1 (8.3)	1			0 (0)				0 (0)								50		1	8.33333	0	0	0
Do you have contact with any of the following?	157				12				60				11												0
Dust		154 (98.1)	1.21 (0.29 - 5.14)	0.796		11 (91.7)	0.22 (0.02 - 1.92)	0.169		59 (98.3)	1.35 (0.16 - 11.14)	0.783		11 (100)	1.35 (0.16 - 11.14)	0.783						154	98.0892	11	91.6667	59	98.3333	11	100
Cockroaches		121 (77.1)	1.38 (0.86 - 2.21)	0.188		10 (83.3)	1.83 (0.39 - 8.5)	0.441		47 (78.3)	1.36 (0.7 - 2.64)	0.359		9 (81.8)	1.36 (0.7 - 2.64)	0.359						121	77.0701	10	83.3333	47	78.3333	9	81.8182
Chicken or other birds		78 (49.7)	1.34 (0.89 - 2.03)	0.163		6 (50)	1.21 (0.38 - 3.81)	0.748		29 (48.3)	1.15 (0.66 - 2)	0.625		4 (36.4)	1.15 (0.66 - 2)	0.625						78	49.6815	6	50	29	48.3333	4	36.3636
Car fumes on regular basis		42 (26.8)	0.72 (0.46 - 1.13)	0.155		1 (8.3)	0.2 (0.03 - 1.55)	0.123		20 (33.3)	1.15 (0.64 - 2.08)	0.636		4 (36.4)	1.15 (0.64 - 2.08)	0.636						42	26.7516	1	8.33333	20	33.3333	4	36.3636
Pollen		44 (28)	1.07 (0.67 - 1.69)	0.781		4 (33.3)	1.35 (0.4 - 4.57)	0.633		15 (25)	0.87 (0.46 - 1.64)	0.666		3 (27.3)	0.87 (0.46 - 1.64)	0.666						44	28.0255	4	33.3333	15	25	3	27.2727
Cats		40 (25.5)	1.38 (0.85 - 2.26)	0.194		5 (41.7)	2.6 (0.8 - 8.42)	0.111		15 (25)	1.21 (0.63 - 2.29)	0.568		4 (36.4)	1.21 (0.63 - 2.29)	0.568						40	25.4777	5	41.6667	15	25	4	36.3636
Dogs		33 (21)	1.25 (0.75 - 2.11)	0.394		2 (16.7)	0.85 (0.18 - 3.96)	0.835		15 (25)	1.54 (0.8 - 2.95)	0.197		2 (18.2)	1.54 (0.8 - 2.95)	0.197						33	21.0191	2	16.6667	15	25	2	18.1818
Chemicals		13 (8.3)	1.22 (0.56 - 2.63)	0.62		2 (16.7)	2.58 (0.54 - 12.42)	0.236		4 (6.7)	0.86 (0.29 - 2.58)	0.792		0 (0)	0.86 (0.29 - 2.58)	0.792						13	8.28025	2	16.6667	4	6.66667	0	0
Molds		4 (2.5)	1.86 (0.41 - 8.45)	0.419		2 (16.7)	14.28 (2.47 - 82.68)	0.003		2 (3.3)	2.13 (0.4 - 11.25)	0.373		0 (0)	2.13 (0.4 - 11.25)	0.373						4	2.54777	2	16.6667	2	3.33333	0	0
Currently suffering or diagnosed from the following diseases					12				60				11												0
Rhino sinusitis		41 (26.1)	0.68 (0.43 - 1.07)	0.099		2 (16.7)	0.44 (0.1 - 2.04)	0.295		15 (25)	0.71 (0.38 - 1.34)	0.294		4 (36.4)	0.71 (0.38 - 1.34)	0.294						41	26.1146	2	16.6667	15	25	4	36.3636
Gastroesophageal reflux disease		35 (22.3)	0.85 (0.52 - 1.37)	0.496		5 (41.7)	2.33 (0.72 - 7.52)	0.158		9 (15)	0.51 (0.24 - 1.08)	0.077		4 (36.4)	0.51 (0.24 - 1.08)	0.077						35	22.293	5	41.6667	9	15	4	36.3636
Hypertension		24 (15.3)	1.99 (1.04 - 3.82)	0.037		1 (8.3)	0.71 (0.09 - 5.66)	0.748		10 (16.7)	1.76 (0.82 - 3.81)	0.15		1 (9.1)	1.76 (0.82 - 3.81)	0.15						24	15.2866	1	8.33333	10	16.6667	1	9.09091
HIV		12 (7.6)	1.04 (0.48 - 2.26)	0.922		1 (8.3)	1.13 (0.14 - 9.07)	0.91		5 (8.3)	1.15 (0.42 - 3.16)	0.786		1 (9.1)	1.15 (0.42 - 3.16)	0.786						12	7.64331	1	8.33333	5	8.33333	1	9.09091
Eczema/dermatitis		13 (8.3)	1.87 (0.80 - 4.38)	0.15		1 (8.3)	1.4 (0.17 - 11.38)	0.75		8 (13.3)	3.07 (1.24 - 7.6)	0.015		1 (9.1)	3.07 (1.24 - 7.6)	0.015						13	8.28025	1	8.33333	8	13.3333	1	9.09091
Other diseases		9 (5.7)	1.04 (0.43 - 2.53)	0.933		0 (0)	NA			3 (5)	0.87 (0.25 - 3.04)	0.821		1 (9.1)	0.87 (0.25 - 3.04)	0.821						9	5.73248	0	0	3	5	1	9.09091
Obstructive sleep apnea		5 (3.2)	1.39 (0.40 - 4.90)	0.604		0 (0)	NA			3 (5)	2.31 (0.58 - 9.19)	0.235		0 (0)	2.31 (0.58 - 9.19)	0.235						5	3.18471	0	0	3	5	0	0
Depression or other psychiatry illness		2 (1.3)	2.79 (0.25 - 31.01)	0.404		0 (0)	NA			1 (1.7)	2.64 (0.24 - 29.63)	0.43		0 (0)	2.64 (0.24 - 29.63)	0.43						2	1.27389	0	0	1	1.66667	0	0
Heart failure		1 (0.6)	NA			0 (0)	NA			0 (0)	NA			0 (0)	NA							1	0.636943	0	0	0	0	0	0
Nasal polyps		0 (0)	NA			0 (0)	NA			0 (0)	NA			0 (0)	NA							0	0	0	0	0	0	0	0
COPD		0 (0)	NA			0 (0)	NA			0 (0)	NA			0 (0)	NA							0	0	0	0	0	0	0	0
None of the above		63 (40.1)	1.00 (0.66 - 1.52)	0.995		4 (33.3)	0.74 (0.22 - 2.5)	0.628		21 (35)	0.77 (0.43 - 1.37)	0.379		4 (36.4)	0.77 (0.43 - 1.37)	0.379						63	40.1274	4	33.3333	21	35	4	36.3636
Lung function	157				12				60				11												0
Normal		82 (52.2)	1			5 (41.7)	1			23 (38.3)	1			7 (63.6)	1							82	52.2293	5	41.6667	23	38.3333	7	63.6364
Poor		75 (47.8)	1.11 (0.74 - 1.68)	0.617		7 (58.3)	1.65 (0.52 - 5.31)	0.398		37 (61.7)	2.11 (1.2 - 3.71)	0.01		4 (36.4)	0.66 (0.19 - 2.28)	0.507						75	47.7707	7	58.3333	37	61.6667	4	36.3636
Methacholine challenge test	151				12				58				11												0
Positive		9 (6)	1			2 (16.7)	1			3 (5.2)	1			0 (0)	NA							9	5.96026	2	16.6667	3	5.17241	0	0
Negative		142 (94)	1.13 (0.47 - 2.68)	0.786		10 (83.3)	0.32 (0.07 - 1.56)	0.158		55 (94.8)	1.3 (0.37 - 4.51)	0.684		11 (100)								142	94.0397	10	83.3333	55	94.8276	11	100
Skin prick, at least one allergen positive, n (%)	156				12				60				11												0
Yes		154 (98.7)	9.38 (2.15 - 40.95)	0.003		12 (100)	NA			60 (100)	NA			11 (100)	NA							154	98.7179	12	100	60	100	11	100
No		2 (1.3)	1			0 (0)				0 (0)				0 (0)								2	1.28205	0	0	0	0	0	0
Eosinophilic count, n (%)	157				12				60				11												0
AEC≤500		133 (84.7)	1			0 (0)	NA			52 (86.7)	1			11 (100)	NA							133	84.7134	0	0	52	86.6667	11	100
AEC>500		24 (15.3)	0.80 (0.46 - 1.39)	0.426		12 (100)				8 (13.3)	0.71 (0.32 - 1.58)	0.398		0 (0)								24	15.2866	12	100	8	13.3333	0	0
Patient uses ICS:	154				12				59				11												0
Yes		14 (9.1)	0.98 (0.48 - 2.01)	0.956		0 (0)	NA			6 (10.2)	1.14 (0.45 - 2.9)	0.776		2 (18.2)	2.27 (0.47 - 10.97)	0.307						14	9.09091	0	0	6	10.1695	2	18.1818
No		140 (90.9)	1			12 (100)				53 (89.8)	1			9 (81.8)	1							140	90.9091	12	100	53	89.8305	9	81.8182
History of smoking, n (%)	157				12				60				11
Current smoker		1 (0.6)	1			0 (0)	1			0 (0)	1			0 (0)	NA
Former smoker		10 (6.4)	1.17 (0.49 - 2.78)	0.722		1 (8.3)	1.47 (0.18 - 11.95)	0.718		3 (5)	0.81 (0.23 - 2.84)	0.748		0 (0)
Never		146 (93)	NA			11 (91.7)	NA			57 (95)	NA			11 (100)
Secondary smoker	157				12				60				11
Yes		8 (5.1)	0.92 (0.37 - 2.3)	0.854		1 (8.3)	1.64 (0.2 - 13.38)	0.644		3 (5)	0.92 (0.26 - 3.24)	0.896		1 (9.1)	1.81 (0.22 - 14.89)	0.581
No		149 (94.9)	1			11 (91.7)	1			57 (95)	1			10 (90.9)	1
Relatives who have asthma, n (%)	156				12				60				11
Yes		89 (57.1)	1			7 (58.3)	1			33 (55)	1			7 (63.6)	1
No		41 (26.3)	1.28 (0.78 - 2.1)	0.335		2 (16.7)	0.71 (0.14 - 3.47)	0.668		14 (23.3)	1.07 (0.54 - 2.11)	0.847		1 (9.1)	0.35 (0.04 - 2.88)	0.328
Don’t know		26 (16.7)	1.11 (0.63 - 1.97)	0.721		3 (25)	1.59 (0.4 - 6.34)	0.512		13 (21.7)	1.55 (0.76 - 3.17)	0.229		3 (27.3)	1.59 (0.4 - 6.34)	0.512
Exposed to smoke from firewood, charcoal.	157				12				60				11
Yes		145 (92.4)	1.09 (0.51 - 2.34)	0.819		12 (100)	NA			58 (96.7)	2.84 (0.66 - 12.25)	0.162		10 (90.9)	0.87 (0.11 - 7.02)	0.895
No		12 (7.6)	1			0 (0)				2 (3.3)	1			1 (9.1)	1
Use of kerosene for lighting or cooking, n (%)	157				12				60				11
Yes		17 (10.8)	0.7 (0.37 - 1.32)	0.269		1 (8.3)	0.59 (0.08 - 4.71)	0.623		5 (8.3)	0.56 (0.21 - 1.47)	0.238		2 (18.2)	1.49 (0.31 - 7.13)	0.615
No		140 (89.2)	1			11 (91.7)	1			55 (91.7)	1			9 (81.8)	1
Depression status according to total PHQ-9 score	157				12				60				11
No depression		9 (5.7)	1			0 (0)	1			1 (1.7)	1			0 (0)	1
Minimal depression		42 (26.8)	0.52 (0.17 - 1.57)	0.246		4 (33.3)	2 (0.22 - 18.41)	0.541		18 (30)	3.23 (0.4 - 26.19)	0.272		4 (36.4)	0.98 (0.17 - 5.54)	0.98
Mild depression		41 (26.1)	0.38 (0.13 - 1.14)	0.085		1 (8.3)	0.41 (0.03 - 6.71)	0.532		14 (23.3)	1.98 (0.24 - 16.24)	0.525		4 (36.4)	0.83 (0.15 - 4.67)	0.828
Moderate depression		44 (28)	0.61 (0.2 - 1.86)	0.385		6 (50)	3.21 (0.37 - 27.47)	0.287		19 (31.7)	3.64 (0.45 - 29.48)	0.225		1 (9.1)	0.25 (0.02 - 2.8)	0.259
Moderately severe depression		19 (12.1)	0.45 (0.14 - 1.48)	0.19		1 (8.3)	NA			7 (11.7)	2.45 (0.28 - 21.71)	0.421		2 (18.2)	1
Severe depression		2 (1.3)	0.15 (0.02 - 0.94)	0.043		0 (0)	NA			1 (1.7)	1.4 (0.08 - 25.14)	0.819		0 (0)
Patient uses inhaler medication:					12				59				11
Yes		47 (30.5)	1.12 (0.71 - 1.76)	0.635		1 (8.3)	0.21 (0.03 - 1.67)	0.141		22 (37.3)	1.56 (0.87 - 2.79)	0.138		3 (27.3)	0.91 (0.24 - 3.49)	0.887
No		107 (69.5)	1			11 (91.7)	1			37 (62.7)	1			8 (72.7)	1
Asthma triggers	157				12				60				11
Upper respiratory infection		154 (98.1)	NA			12 (100)	NA			60 (100)	NA			11 (100)	NA
Exposure to household pets such as cats, dogs or poultry		6 (3.8)	1.19 (0.39 - 3.62)	0.756		0 (0)	NA			2 (3.3)	0.95 (0.21 - 4.4)	0.948		0 (0)	NA
Smoking or exposure to tobacco smoke		149 (94.9)	0.9 (0.35 - 2.33)	0.828		12 (100)	NA			59 (98.3)	3.38 (0.44 - 25.87)	0.241		11 (100)	NA
Strong emotions such as anger, excitement, anxiety		77 (49)	0.47 (0.31 - 0.71)	0		6 (50)	0.67 (0.21 - 2.11)	0.492		33 (55)	0.8 (0.46 - 1.39)	0.426		9 (81.8)	3.13 (0.67 - 14.71)	0.148
Cold weather		138 (87.9)	0.5 (0.24 - 1.03)	0.061		10 (83.3)	0.47 (0.1 - 2.23)	0.341		53 (88.3)	0.68 (0.28 - 1.66)	0.399		8 (72.7)	0.24 (0.06 - 0.95)	0.043
Drugs such those treating high blood pressure and pain killers like aspirin		1 (0.6)	NA			0 (0)	NA			0 (0)	NA			0 (0)	NA
Exercise		55 (35)	1.38 (0.89 - 2.14)	0.154		3 (25)	0.73 (0.2 - 2.76)	0.648		21 (35)	1.24 (0.69 - 2.22)	0.467		4 (36.4)	1.28 (0.37 - 4.46)	0.698
Dust		149 (94.9)	0.62 (0.22 - 1.75)	0.367		11 (91.7)	0.44 (0.05 - 3.67)	0.45		59 (98.3)	2.75 (0.36 - 21.34)	0.332		11 (100)	NA
Strong smells or perfumes		132 (84.1)	0.98 (0.56 - 1.72)	0.947		11 (91.7)	2.1 (0.27 - 16.57)	0.482		47 (78.3)	0.62 (0.31 - 1.24)	0.175		10 (90.9)	1.9 (0.24 - 15.14)	0.544
Exposure at work		4 (2.5)	0.6 (0.18 - 2)	0.409		0 (0)	NA			1 (1.7)	2.42 (0.72 - 8.13)	0.153		1 (9.1)	2.93 (0.35 - 24.73)	0.324
Other		2 (1.3)	0.92 (0.15 - 5.57)	0.928		0 (0)	NA			1 (1.7)	1.31 (0.14 - 11.96)	0.809		0 (0)	NA
None of the above		0 (0)	NA			0 (0)	NA			0 (0)	NA			0 (0)	NA
Currently or recently used the following medication	157				12				60				11
Aspirin		2 (1.3)	0.69 (0.12 - 3.8)	0.667		0 (0)	NA			1 (1.7)	1.05 (0.12 - 9.13)	0.967		0 (0)	NA
NSAIDs		0 (0)	NA			0 (0)	NA			0 (0)	NA			0 (0)	NA
ACE inhibitors		3 (1.9)	2.09 (0.35 - 12.68)	0.421		1 (8.3)	8.14 (0.84 - 78.91)	0.071		1 (1.7)	1.31 (0.14 - 11.96)	0.809		0 (0)	NA
Beta blockers		3 (1.9)	NA			0 (0)	NA			1 (1.7)	2.64 (0.24 - 29.63)	0.43		0 (0)	NA
Estrogens		2 (1.3)	1.39 (0.19 - 9.95)	0.745		0 (0)	NA			0 (0)	NA			0 (0)	NA
Herbs		9 (5.7)	0.95 (0.4 - 2.29)	0.917		0 (0)	NA			5 (8.3)	1.59 (0.56 - 4.48)	0.382		2 (18.2)	3.81 (0.77 - 18.82)	0.101
Supplements		0 (0)	NA			0 (0)	NA			0 (0)	NA			0 (0)	NA
Others		31 (19.7)	1.06 (0.63 - 1.78)	0.837		2 (16.7)	0.83 (0.18 - 3.89)	0.818		12 (20)	1.06 (0.53 - 2.11)	0.872		3 (27.3)	1.6 (0.41 - 6.18)	0.497
None of the above		114 (72.6)	0.94 (0.59 - 1.5)	0.809		10 (83.3)	1.86 (0.4 - 8.62)	0.43		43 (71.7)	0.91 (0.49 - 1.68)	0.761		6 (54.5)	0.43 (0.13 - 1.43)	0.166
Episodes of exacerbations; median (IQR)	157	8 (3 - 20)	1.00 (1.00 - 1.01)	0.295	12	8 (4.5 - 20)	1.00 (0.98 - 1.02)	0.971	60	10 (3 - 20)	1.01 (1.00 - 1.02)	0.043	11	5 (3 - 20)	1.00 (0.98 - 1.02)	0.935
Asthma quality of life score; median (IQR)	157	128 (111 - 153)	1.00 (0.99 - 1.01)	0.957	12	125 (116.5 - 149.5)	1.00 (0.98 - 1.02)	0.987	60	126 (107.5 - 147.0)	1.00 (0.99 - 1.00)	0.263	11	127 (112 - 155)	1.00 (0.98 - 1.02)	0.877

## Sheet: Crude Workspace 1
Code		SN	OR			P	LCI	UCI	OR (95% CI)	P
9	Dust	A	1.34528	1.45082	0.28	0.783	0.162491	11.1377	1.35 (0.16 - 11.14)	0.783
4	Cockroaches	B	1.3637	0.460868	0.92	0.359	0.703154	2.64476	1.36 (0.7 - 2.64)	0.359
3	Chicken or other birds	C	1.14779	0.323859	0.49	0.625	0.660221	1.99543	1.15 (0.66 - 2)	0.625
8	Car fumes on regular basis	D	1.15263	0.345967	0.47	0.636	0.640028	2.07578	1.15 (0.64 - 2.08)	0.636
6	Pollen	E	0.869732	0.281541	-0.43	0.666	0.46115	1.64032	0.87 (0.46 - 1.64)	0.666
1	Cats	F	1.20588	0.395669	0.57	0.568	0.633888	2.29402	1.21 (0.63 - 2.29)	0.568
2	Dogs	G	1.53571	0.510777	1.29	0.197	0.800206	2.94726	1.54 (0.8 - 2.95)	0.197
7	Chemicals	H	0.863095	0.482849	-0.26	0.792	0.288312	2.58377	0.86 (0.29 - 2.58)	0.792
5	Molds	I	2.13103	1.80884	0.89	0.373	0.403722	11.2486	2.13 (0.4 - 11.25)	0.373

## Sheet: Crude Workspace 2
Code	Disease	SN	OR			P	LCI	UCI	OR (95% CI)	P
1	Rhino sinusitis	A	0.713333	0.229558	-1.05	0.294	0.379636	1.34035	0.71 (0.38 - 1.34)	0.294
5	Gastroesophageal reflux disease	B	0.507625	0.194862	-1.77	0.077	0.239217	1.07719	0.51 (0.24 - 1.08)	0.077
10	Hypertension	C	1.7625	0.693441	1.44	0.15	0.815139	3.8109	1.76 (0.82 - 3.81)	0.15
7	HIV	D	1.1502	0.592208	0.27	0.786	0.419285	3.15526	1.15 (0.42 - 3.16)	0.786
3	Eczema/dermatitis	E	3.06667	1.41945	2.42	0.015	1.23788	7.59724	3.07 (1.24 - 7.6)	0.015
11	Other diseases	F	0.865497	0.554061	-0.23	0.821	0.246806	3.03511	0.87 (0.25 - 3.04)	0.821
6	Obstructive sleep apnea	G	2.30827	1.62728	1.19	0.235	0.579709	9.19102	2.31 (0.58 - 9.19)	0.235
4	Depression or other psychiatry illness	H	2.64407	3.25999	0.79	0.43	0.235932	29.6318	2.64 (0.24 - 29.63)	0.43
9	Heart failure	I				NA			0 (0 - 0)	NA
2	Nasal polyps	J				NA			0 (0 - 0)	NA
8	COPD	K				NA			0 (0 - 0)	NA
12	None of the above	L	0.772212	0.227006	-0.88	0.379	0.434021	1.37393	0.77 (0.43 - 1.37)	0.379

## Sheet: Crude Workspace 3
Variable	SN	OR			P	LCI	UCI	OR (95% CI)	P
History of smoking, n (%)								0 (0 - 0)	0
Current smoker	1	1	(empty)					1 (0 - 0)	0
Former smoker	2	1	(empty)					1 (0 - 0)	0
Never	3	1	(omitted)					1 (0 - 0)	0
Secondary smoker								0 (0 - 0)	0
Yes	1.contact_smoke	1.81053	1.94624	0.55	0.581	0.22019	14.8872	1.81 (0.22 - 14.89)	0.581
No								0 (0 - 0)	0
Relatives who have asthma, n (%)								0 (0 - 0)	0
Yes								0 (0 - 0)	0
No	2	0.349026	0.37573	-0.98	0.328	0.0423186	2.87862	0.35 (0.04 - 2.88)	0.328
Don’t know	3	1.58867	1.1212	0.66	0.512	0.398381	6.33533	1.59 (0.4 - 6.34)	0.512
Exposed to smoke from firewood, charcoal.								0 (0 - 0)	0
Yes	1.biomass_smoke	0.868263	0.926025	-0.13	0.895	0.107355	7.02231	0.87 (0.11 - 7.02)	0.895
No								0 (0 - 0)	0
Use of kerosene for lighting or cooking, n (%)								0 (0 - 0)	0
Yes	1.kerosene	1.49409	1.19111	0.5	0.615	0.313175	7.128	1.49 (0.31 - 7.13)	0.615
No								0 (0 - 0)	0
Depression status according to total PHQ-9 score								0 (0 - 0)	0
No depression	1	1	(empty)					1 (0 - 0)	0
Minimal depression	2	0.978261	0.865687	-0.02	0.98	0.172665	5.54248	0.98 (0.17 - 5.54)	0.98
Mild depression	3	0.825688	0.729881	-0.22	0.828	0.14601	4.66928	0.83 (0.15 - 4.67)	0.828
Moderate depression	4	0.247253	0.306156	-1.13	0.259	0.0218353	2.79978	0.25 (0.02 - 2.8)	0.259
Moderately severe depression	5	1	(omitted)					1 (0 - 0)	0
Severe depression	6	1	(empty)					1 (0 - 0)	0
Patient uses inhaler medication:								0 (0 - 0)	0
Yes	.patient_inhelar	0.907143	0.623092	-0.14	0.887	0.236052	3.48612	0.91 (0.24 - 3.49)	0.887
No								0 (0 - 0)	0
What makes asthma worse								0 (0 - 0)	0
Upper respiratory infection								0 (0 - 0)	0
Exposure to household pets such as cats, dogs or poultry								0 (0 - 0)	0
Smoking or exposure to tobacco smoke								0 (0 - 0)	0
Strong emotions such as anger, excitement, anxiety	1.asthma_worse___4	3.13318	2.47203	1.45	0.148	0.667422	14.7085	3.13 (0.67 - 14.71)	0.148
Cold weather	.asthma_worse___5	0.24024	0.168968	-2.03	0.043	0.0605302	0.953497	0.24 (0.06 - 0.95)	0.043
Drugs such those treating high blood pressure and pain killers like aspirin								0 (0 - 0)	0
Exercise	.asthma_worse___7	1.28061	0.815751	0.39	0.698	0.367453	4.46307	1.28 (0.37 - 4.46)	0.698
Dust								0 (0 - 0)	0
Strong smells or perfumes	asthma_worse___9	1.90163	2.01296	0.61	0.544	0.238832	15.1412	1.9 (0.24 - 15.14)	0.544
Exposure at work	1.asthma_worse___10	2.925	3.18568	0.99	0.324	0.345992	24.7279	2.93 (0.35 - 24.73)	0.324
Other								0 (0 - 0)	0
None of the above								0 (0 - 0)	0
Currently or recently used the following medication								0 (0 - 0)	0
Aspirin								0 (0 - 0)	0
NSAIDs								0 (0 - 0)	0
ACE inhibitors								0 (0 - 0)	0
Beta blockers								0 (0 - 0)	0
Estrogens								0 (0 - 0)	0
Herbs	used_medicine___6	3.81111	3.10559	1.64	0.101	0.77166	18.8225	3.81 (0.77 - 18.82)	0.101
Supplements								0 (0 - 0)	0
Others	1.used_medicine___8	1.59783	1.10265	0.68	0.497	0.413163	6.17927	1.6 (0.41 - 6.18)	0.497
None of the above	used_medicine___9	0.425373	0.262536	-1.38	0.166	0.126887	1.42601	0.43 (0.13 - 1.43)	0.166

## Sheet: Crude Workspace 4
Variable					N	n (%)
History of smoking, n (%)					11
Current smoker		0				0 (0)
Former smoker		0				0 (0)
Never	3	11	100	100		11 (100)
Secondary smoker					11
Yes		1	9.09091			1 (9.1)
No		10	90.9091			10 (90.9)
Relatives who have asthma, n (%)					11
Yes	1	7	63.64	63.64		7 (63.6)
No	2	1	9.09	72.73		1 (9.1)
Don’t know	3	3	27.27	100		3 (27.3)
Exposed to smoke from firewood, charcoal.					11
Yes		10	90.9091			10 (90.9)
No		1	9.09091			1 (9.1)
Use of kerosene for lighting or cooking, n (%)					11
Yes		2	18.1818			2 (18.2)
No		9	81.8182			9 (81.8)
Depression status according to total PHQ-9 score					11
No depression		0				0 (0)
Minimal depression	2	4	36.36	36.36		4 (36.4)
Mild depression	3	4	36.36	72.73		4 (36.4)
Moderate depression	4	1	9.09	81.82		1 (9.1)
Moderately severe depression	5	2	18.18	100		2 (18.2)
Severe depression		0				0 (0)
Patient uses inhaler medication:					11
Yes		3	27.2727			3 (27.3)
No		8	72.7273			8 (72.7)
What makes asthma worse					11
Upper respiratory infection		11	100			11 (100)
Exposure to household pets such as cats, dogs or poultry		0	0			0 (0)
Smoking or exposure to tobacco smoke		11	100			11 (100)
Strong emotions such as anger, excitement, anxiety		9	81.8182			9 (81.8)
Cold weather		8	72.7273			8 (72.7)
Drugs such those treating high blood pressure and pain killers like aspirin		0	0			0 (0)
Exercise		4	36.3636			4 (36.4)
Dust		11	100			11 (100)
Strong smells or perfumes		10	90.9091			10 (90.9)
Exposure at work		1	9.09091			1 (9.1)
Other		0	0			0 (0)
None of the above		0	0			0 (0)
Currently or recently used the following medication					11
Aspirin		0	0			0 (0)
NSAIDs		0	0			0 (0)
ACE inhibitors		0	0			0 (0)
Beta blockers		0	0			0 (0)
Estrogens		0	0			0 (0)
Herbs		2	18.1818			2 (18.2)
Supplements		0	0			0 (0)
Others		3	27.2727			3 (27.3)
None of the above		6	54.5455			6 (54.5)
